1 Chromosome-scale genome assembly of the brown anole (*Anolis sagrei*), a model species for  
2 evolution and ecology  
3  
4

5 Anthony J. Geneva<sup>1\*</sup>, Sungdae Park<sup>2</sup>, Dan Bock<sup>3</sup>, Pietro de Mello<sup>4</sup>, Fatih Sarigol<sup>5</sup>, Marc Tollis<sup>6</sup>,  
6 Colin Donihue<sup>7</sup>, R. Graham Reynolds<sup>8</sup>, Nathalie Feiner<sup>9</sup>, Ashley M. Rasys<sup>2,10</sup>, James D.  
7 Lauderdale<sup>10</sup>, Sergio G. Minchey<sup>2</sup>, Aaron J. Alcalá<sup>2</sup>, Carlos R. Infante<sup>11</sup>, Jason J. Kolbe<sup>12</sup>, Dolph  
8 Schluter<sup>13</sup>, Douglas B. Menke<sup>2</sup>, Jonathan B. Losos<sup>3,14</sup>  
9

10 <sup>1</sup> Department of Biology, Center for Computational and Integrative Biology, Rutgers University–  
11 Camden, Camden, USA

12 <sup>2</sup> Department of Genetics, University of Georgia, Athens, USA

13 <sup>3</sup> Department of Biology, Washington University in St. Louis, St. Louis, USA

14 <sup>4</sup> Department of Ecology and Evolutionary Biology and Biodiversity Institute and Natural  
15 History Museum, University of Kansas, Lawrence, USA

16 <sup>5</sup> Max Perutz Labs, Medical University of Vienna, Vienna, Austria

17 <sup>6</sup> School of Informatics, Computing and Cyber Systems, Northern Arizona University, Flagstaff,  
18 USA

19 <sup>7</sup> Institute at Brown for Environment and Society, Brown University, Providence RI, USA

20 <sup>8</sup> Department of Biology, University of North Carolina Asheville, One University Heights,  
21 Asheville, USA

22 <sup>9</sup> Department of Biology, Lund University; 223 62 Lund, Sweden

23 <sup>10</sup> Department of Cellular Biology, University of Georgia, Athens, USA

24 <sup>11</sup> Department of Integrative Biology, University of Colorado Denver, Denver, USA

25 <sup>12</sup> Department of Biological Sciences, University of Rhode Island, Kingston, USA

26 <sup>13</sup> Department of Zoology, University of British Columbia, Vancouver, Canada

27 <sup>14</sup> Living Earth Collaborative, Washington University in St. Louis, St. Louis, USA  
28  
29

30 \* Correspondence to be sent to [anthony.geneva@rutgers.edu](mailto:anthony.geneva@rutgers.edu)  
31

32 **Abstract**

33 Rapid technological improvements are democratizing access to high quality, chromosome-scale  
34 genome assemblies. No longer the domain of only the most highly studied model organisms,  
35 now non-traditional and emerging model species can be genome-enabled using a combination of  
36 sequencing technologies and assembly software. Consequently, old ideas built on sparse  
37 sampling across the tree of life have recently been amended in the face of genomic data drawn  
38 from a growing number of high-quality reference genomes. Arguably the most valuable are those  
39 long-studied species for which much is already known about their biology; what many term  
40 emerging model species. Here, we report a new, highly complete chromosome-scale genome  
41 assembly for the brown anole, *Anolis sagrei* – a lizard species widely studied across a variety of  
42 disciplines and for which a high-quality reference genome was long overdue.  
43  
44  
45

## 46 **Introduction**

47 Recent breakthroughs in high-throughput sequencing, coupled with the creation of long-distance  
48 scaffolding libraries, have ushered in an era of ever-improving quality and quantity of genome  
49 assemblies. Genome assemblies now routinely span entire chromosomes and include data from  
50 formerly impenetrable genomic regions<sup>1-3</sup>. In turn, these assemblies have enabled increasingly  
51 sophisticated genomic analyses of organismal traits and behaviors, and the evolutionary and  
52 ecological implications of the interactions of genomes and the environment. Massive reductions  
53 in the cost of genome sequencing and assembly have allowed non-model and emerging model  
54 species to become genome-enabled, a neologism indicating that genomic information has  
55 become available for the species. Observations from these new assemblies have provided fresh  
56 insights into core biological processes. For example, our understanding of recombination<sup>4</sup>,  
57 repetitive genetic elements<sup>5,6</sup>, chromosome evolution<sup>7-9</sup> and dosage compensation<sup>4,10,11</sup> have all  
58 been fundamentally amended due to results made possible by recent genome assemblies of non-  
59 traditional model species.

60  
61 Efforts are underway to generate thousands of new genome assemblies for species across the tree  
62 of life<sup>12-14</sup>. However, our understanding of the biology of most species on earth remains sorely  
63 lacking – limiting the inferential power gained by the addition of genomic data. In contrast, those  
64 species for which the existing organismal literature is vast are particularly primed for the  
65 generation of new, high-quality genome assemblies because new discoveries concerning the  
66 genetic basis of organismal traits await only the addition of a highly complete and contiguous  
67 reference genome.

68  
69 While the production of highly contiguous genome assemblies is a technological achievement,  
70 the long-term value of these assemblies is that they serve as critical tools in the advancement of  
71 biological research. Evolutionary genomic techniques such as quantitative trait locus mapping or  
72 genome-wide association studies enable careful examination of the genetic basis of organismal  
73 traits, but these rely on linkage disequilibrium information to connect genotype to phenotype.  
74 Improved contiguity of genome assemblies therefore paved the way for a finer and more accurate  
75 understanding of the genomic basis of organismal traits.

76  
77 Further, understanding the evolutionary history of a species' chromosomes similarly requires  
78 highly complete genome assemblies since only with these data can chromosomal sequence  
79 homology be reliably inferred<sup>15,16</sup>. While cytogenetics opened the door to inferring evolutionary  
80 transitions in chromosome complement well over 100 years ago<sup>17</sup>, only recently through genome  
81 sequencing have the evolutionary drivers and consequences of these changes begun to be  
82 understood. While the first wave of genome assemblies lacked the contiguity and completeness  
83 to fully determine syntenic relationships between species, new chromosome-scale assemblies  
84 now enable rigorous study of chromosome evolution.

85  
86 Finally, population genomic scans also benefit from improved contiguity. For example, recent  
87 selective sweeps leave patterns of reduced genetic diversity in the genomic regions surrounding  
88 the selected variant. Many methods to detect recent selection rely on these patterns but poorly  
89 constructed genome assemblies can separate that signal onto separate scaffolds and limit our  
90 ability to detect these patterns.

91

92 *The Brown Anole*

93 *Anolis* lizards (anoles) comprise over 400 small- to medium-sized lizard species distributed  
94 throughout the continental neotropics of South, Central, and North America, and across islands  
95 in the West Indies and eastern Pacific Ocean<sup>18</sup>. The green anole (*Anolis carolinensis*) was the  
96 first reptile to have its full genome assembled<sup>19</sup>. While it was sequenced using first-generation  
97 genome sequencing technologies over 10 years ago, it remains one of the best assembled and  
98 annotated reptile genomes and by far the most complete and contiguous assembly within the  
99 genus *Anolis*. It was selected for genome sequencing due to many decades of biomedical  
100 research—especially epidemiology and neurobiology—using this species as a model. Recently, a  
101 second species, the brown anole (*Anolis sagrei*), has surpassed the green anole in the number of  
102 publications per year (Fig. 1) and is considered an emerging model species for numerous fields.

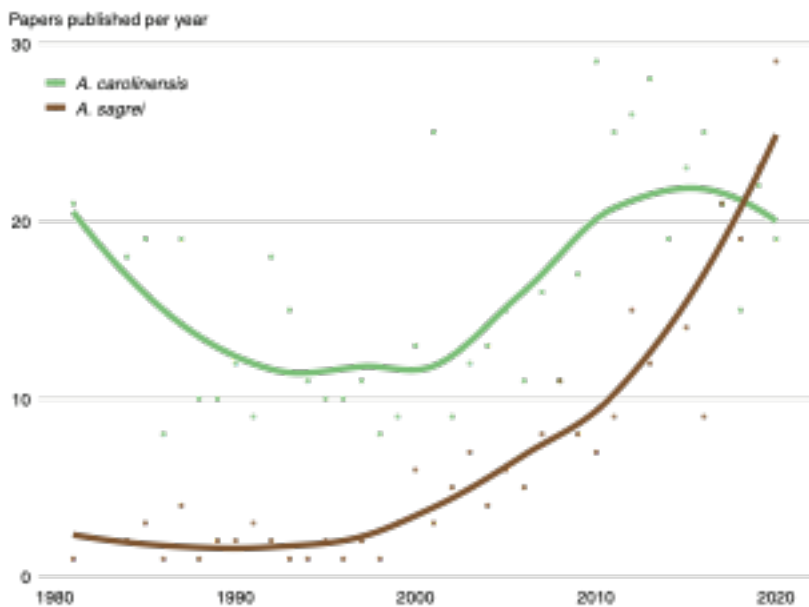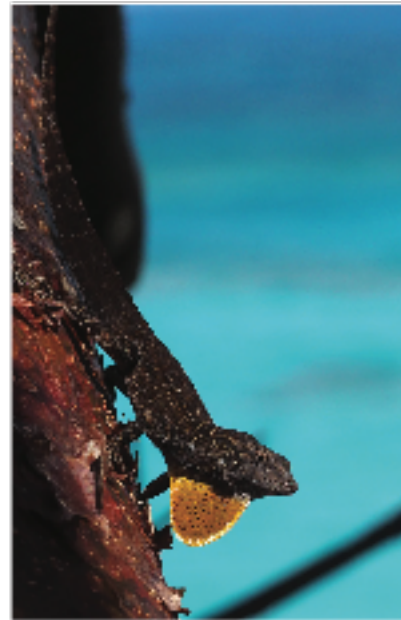

103 **Figure 1. The rise of *Anolis sagrei*.** Over the past 40 years research interest in *Anolis sagrei* (pictured at right) has  
104 grown substantially and recently surpassed that of *A. carolinensis*, which for many decades served as the model  
105 reptile species in biological research. Queries for each specific epithet were performed in the indexed Titles and  
106 Abstracts on <https://www.dimensions.ai> (accessed May 2021).  
107

108  
109 *Anolis sagrei* is a medium-sized insectivorous lizard most commonly found on the ground and  
110 perched low on the trunks of trees<sup>20</sup>. Although it first arose on Cuba, the species now has the  
111 largest native range of any anole with natural diaspora populations found across islands of the  
112 northern Caribbean as well as coastal areas of Mesoamerica<sup>21,22</sup>. It is also a prolific invader with  
113 non-native populations established on many additional islands in the West Indies<sup>23,24</sup>, Costa Rica,  
114 multiple locations in both North<sup>25</sup> and South America<sup>26,27</sup>, as well as remote islands of the central  
115 Atlantic Ocean<sup>28,29</sup>, Hawaii<sup>30</sup>, Taiwan, and mainland Asia, Europe, and the Middle East.

116  
117 A recent analysis of genome-scale sequence data revealed that *A. sagrei* evolved on Cuba toward  
118 the end of the Miocene<sup>22</sup>. Two major lineages are present on East and West Cuba, and although  
119 they are not geographically separate, they represent ancient evolutionary separation and probable  
120 recent secondary contact. Both lineages have given rise to diaspora populations that have  
121 colonized other island groups. The western Cuba lineage colonized the Bahamas Archipelago in  
122 both the Pliocene and Pleistocene, while the eastern lineage colonized the Cayman Archipelago,

123 the Swan Islands, Mesoamerica, and Jamaica at different periods during the Pleistocene<sup>22</sup>. These  
124 diaspora lineages, despite different evolutionary backgrounds and divergence times, have  
125 evolved a similar suite of phenotypic traits such that Cuban *A. sagrei* can be distinguished from  
126 diaspora *A. sagrei* using both genetic and phenotypic characters<sup>22</sup>. This suggests that the species  
127 has responded to presumably similar evolutionary selective pressures when colonizing islands  
128 elsewhere in the Caribbean. Notably, both relatively larger body size and increased number of  
129 subdigital lamellar scales appear to be features of diasporic lineages, although it is currently  
130 unknown whether similar genomic changes are responsible for these outcomes.

131  
132 Multiple factors have led to the rapidly increasing use of *A. sagrei* for research in evolution and  
133 ecology. These include its wide natural and invasive ranges, its high local abundance, and the  
134 fact that this species is amenable to captive treatments including breeding and rearing in a  
135 laboratory setting<sup>31,32</sup>. As a result, this species has been the focus of years of detailed  
136 evolutionary, developmental, ecological, behavioral, and physiological research conducted both  
137 in natural environments and in the lab<sup>33</sup>. Over the past three decades, the brown anole has  
138 become a broadly used system to study evolutionary ecology<sup>34-36</sup>, behavior<sup>37,38</sup>, development<sup>39-43</sup>,  
139 reproductive isolation<sup>44</sup>, sexual selection<sup>45-47</sup>, biological invasions<sup>48-51</sup>, and adaptation<sup>52-54</sup>.  
140 However, the lack of a reference genome has made it challenging to connect this depth of  
141 knowledge of brown anole phenotypes to their underlying genetic architecture. Despite this  
142 limitation, the brown anole has been at the forefront of new techniques including chromosome  
143 microdissection and sequencing<sup>55,56</sup> and recently became the first reptile to successfully undergo  
144 CRISPR-Cas9 genome editing<sup>57</sup>. This last breakthrough begs for the production of a high-quality  
145 reference genome to establish the brown anole as a fully-fledged model organism.

146  
147 Here, we report a highly complete and contiguous genome assembly of a single female brown  
148 anole (*Anolis sagrei ordinatus*) from the Central Bahamas. We supplement this assembly with  
149 evidence-based and *ab initio* gene model annotation, repetitive element identification and  
150 analysis, and a map of segregating genetic diversity. Finally, we build on existing research to  
151 confirm the identity of the *A. sagrei* X chromosome and identify patterns of the evolution of the  
152 *A. sagrei* X chromosome relative to its counterparts in the *A. carolinensis* genome.

## 153 154 **Results and Discussion**

155 We created a highly complete and contiguous draft genome assembly of *A. sagrei* through  
156 multiple rounds of iterative improvement. Our initial assembly using only Illumina whole-  
157 genome shotgun sequences and assembled using meraculous<sup>58</sup> produced a largely fragmented  
158 assembly, which was incomplete in terms of gene content and total size (Table S1). Subsequent  
159 scaffolding performed in HiRise<sup>59</sup> using Chicago and HiC proximity ligation libraries  
160 substantially improved both contiguity and completeness, but the assembly remained  
161 substantially smaller (1.6Gb) than the 1.8Gb assembly of *A. carolinensis* and a genome size  
162 estimate of 1.89Gb for *A. sagrei* based on fluorescence cytophotometry<sup>60</sup>. We further refined the  
163 *A. sagrei* genome assembly by improving contig size with error-corrected PacBio long reads and  
164 re-scaffolding in HiRise. The addition of these data resulted in a far more contiguous and  
165 complete assembly, the size of which (1.93 Gb) very closely matches the expected genome size  
166 for this species (Table S1). Analysis of HiC mapped read link density using Juicer v1.6<sup>61</sup>  
167 revealed that two chromosomes had been artificially joined during the assembly process. Using  
168 evidence from Illumina short-read, RNA-Seq, and PacBio data (see Methods) we corrected this

169 misjoin resulting in the current *A. sagrei* assembly version (hereafter, AnoSag2.1). A link density  
170 histogram of HiC read pairs mapped to the AnoSag2.1 assembly does not show evidence of  
171 remaining misjoins (Fig. 2c). The mitochondrial genome was not captured in this assembly but  
172 was recovered through a combination of circularized *de novo* assembly and identification of  
173 mitochondrial sequence in an error-corrected PacBio read. The consensus of these two  
174 approaches yields a 17,535bp assembly with the 13 genes, 22 tRNAs, and two ribosomal RNAs  
175 expected for vertebrates and with identical gene ordering to the *A. carolinensis* mitochondrial  
176 genome.

177

### 178 *Contiguity and Completeness*

179 Our AnoSag2.1 assembly has a scaffold N50 of 253.6Mb, which is 1.6 times as contiguous as  
180 *Anolis carolinensis*, the longtime standard bearer for reptile genome assemblies<sup>19</sup>. The four  
181 largest AnoSag2.1 scaffolds comprise more than 50% of the genome assembly. The *A. sagrei*  
182 karyotype contains 14 chromosomes: six macrochromosomes, seven microchromosomes and the  
183 intermediately sized X chromosome. Multiple lines of evidence suggest that our assembly  
184 recovers each of these chromosomes as the 14 largest scaffolds. First, the 14 largest scaffolds in  
185 AnoSag2.1 comprise 99.1% of the assembled genome sequence. Furthermore, a large drop-off in  
186 scaffold size occurs after the last putative chromosome – scaffold 14 is over 20Mb in size where  
187 the next largest scaffold is two orders of magnitude smaller (scaffold 15; 131kb). Finally, the  
188 AnoSag2.1 scaffold sizes are highly correlated ( $r^2=0.996$ ,  $p< 2.2 \times 10^{-16}$ ) with chromosome sizes  
189 estimated using a published karyotype<sup>62</sup> of this species (Fig. 2a).

190

191 We assessed completeness of our assembly using BUSCO 5.0.0 which tests for the presence of a  
192 curated set of 3,354 protein-coding genes known to be present in single copy across vertebrate  
193 genomes (vertebrata\_odb10). Of these genes, 3,197 (95.3%) are present in full length and found  
194 to be single-copy in our assembly. The AnoSag2.1 assembly is missing only 1.6% of the genes  
195 from this set. Our assembly exceeds most other Lepidosauria (lizards, snakes, and tuatara)  
196 genome assemblies in contiguity and completeness<sup>4,19,63-66</sup> (Table S2). Only the Argentine black  
197 and white tegu<sup>66</sup> (*Salvator merianae*) exceeds our assembly in BUSCO completeness but is  
198 substantially less contiguous (Fig. 2b). The eastern fence lizard<sup>64</sup> (*Sceloporus undulatus*) is  
199 slightly more contiguous than our assembly but less complete. These two genomes stand apart  
200 from other recent lepidosaur genome assemblies in being both highly complete and contiguous  
201 (Fig. 2b,d).

202

203

204

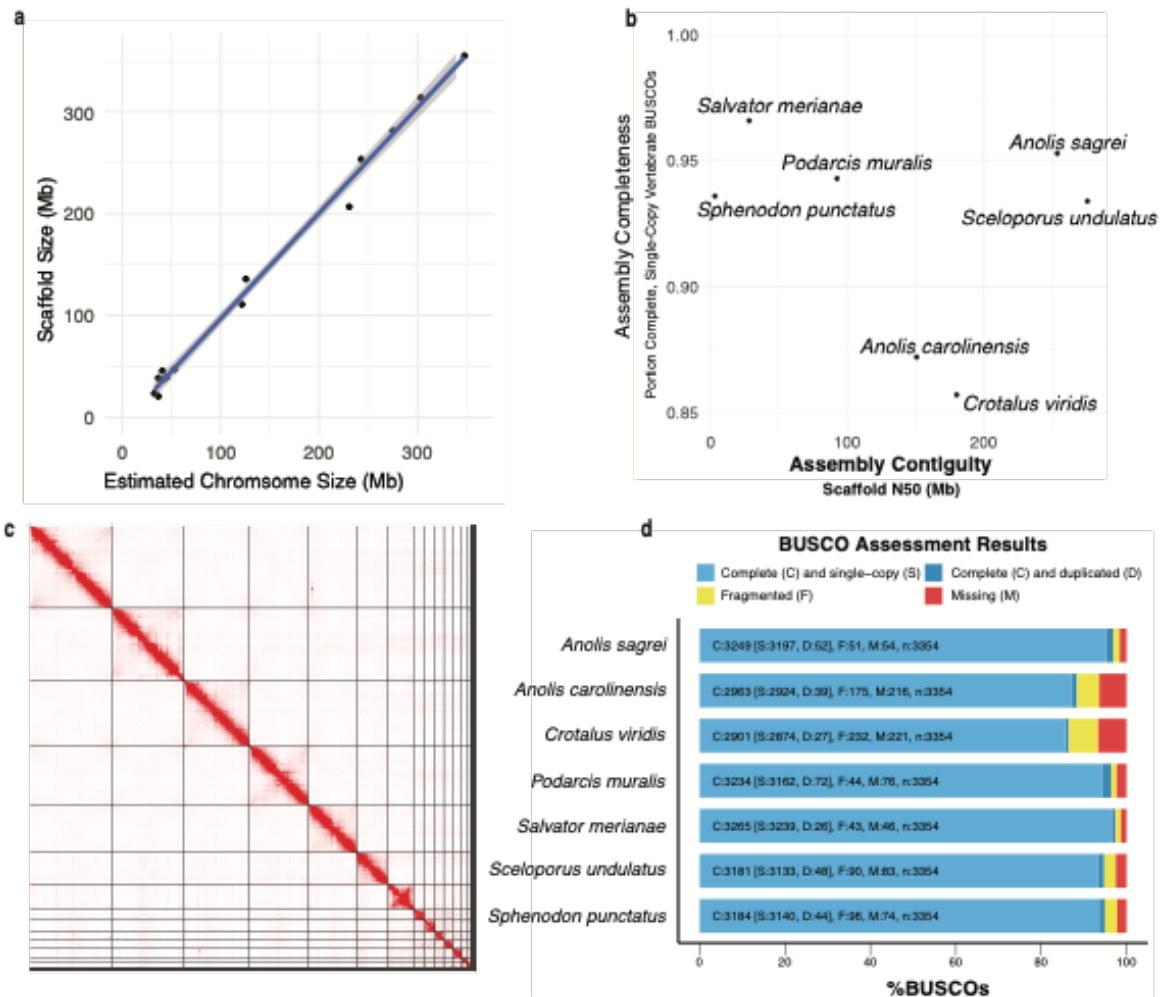

205  
 206 **Figure 2. Contiguity and completeness of *Anolis sagrei* and other lepidosaur assemblies.** **a** The scaffold sizes  
 207 of the AnoSag2.1 assembly are highly correlated with chromosome sizes estimated from karyotype imaging. **b**  
 208 Scatterplot of recent lepidosaur gene assemblies **c**) Link density histogram of the AnoSag2.1 assembly **d**) BUSCO  
 209 assessment of assembly completeness for AnoSag2.1 and other lepidosaur assemblies.  
 210

### 211 Annotation Statistics

212 We performed an automated annotation of our assembly using Braker v2.0.5<sup>67</sup> followed by  
 213 manual curation for roughly 15% of all gene models. This effort resulted in a final set of 21,853  
 214 genes comprising 849 Mb (44.1% of the final assembly length). Most gene models (92%)  
 215 contain more than one exon and all exons summed account for a total length of 55 Mb, or about  
 216 3% of the assembly. Start codons are annotated for 99.7% of all gene model and the same  
 217 percentage have stop codons annotated (although not all within the same genes). BUSCO  
 218 analysis of the annotated exome suggests our annotation captures most of the genes found in the  
 219 homology-based BUSCO search – 95% of vertebrate universal single-copy orthologs were found  
 220 to complete and single copy via homology search of the entire genome sequence versus 90%  
 221 found within the gene models in our annotation (Table S3).

222

### 223 *Repetitive Element Landscape*

224 We estimated 46.3% of the *Anolis sagrei* genome to be repetitive, compared with 32.9% for *A.*  
225 *carolinensis*. Both genomes contained a diversity of transposable elements, including short  
226 interspersed elements (SINEs), long interspersed nuclear elements (LINEs), long terminal repeat  
227 retrotransposons (LTRs), and DNA transposons (Table 1). *Anolis sagrei* contained a higher  
228 proportion of LINEs and DNA transposons, whereas *A. carolinensis* contained relatively more  
229 LTR retrotransposons.

230

231 We examined the age distribution of repeats in each genome, or its repeat landscape, by  
232 comparing the proportion of the assembly comprised of insertions according to their divergence  
233 from family consensus. When comparing the repeat landscapes of the anole genomes, we found  
234 that *A. carolinensis* contained a much higher proportion of transposable element insertions with  
235  $\leq 10\%$  divergence from their family consensus (Fig. 3). This was for DNA transposons (Kruskal  
236 Wallis test;  $P=0.0005$ ), LTR retrotransposons ( $P=8.09e-07$ ), and LINEs ( $P=0.0073$ ), but not  
237 SINEs. This suggests that while the transposable element landscape of the *A. sagrei* genome  
238 includes more DNA transposons and LINEs than *A. carolinensis*, this discrepancy is driven by a  
239 much larger proportion of the genome comprised of ancient insertions beyond 10% Kimura 2-  
240 parameter divergence in *A. sagrei*. In contrast, the transposable element landscape of the *A.*  
241 *carolinensis* genome is dominated by recent inserts which is indicative of recent activity.

242

243 **Table 1. Repetitive Elements.** Comparison of the interspersed repeat contents of *Anolis sagrei*  
244 and *Anolis carolinensis*.

| Repeat Class    | <i>Anolis sagrei</i> |                   | <i>Anolis carolinensis</i> |                   |
|-----------------|----------------------|-------------------|----------------------------|-------------------|
|                 | Length occupied (bp) | Percent of Genome | Length occupied (bp)       | Percent of Genome |
| SINEs           | 71,051,564           | 4.48              | 75,887,012                 | 4.22              |
| LINEs           | 308,353,200          | 19.44             | 234,058,101                | 13.01             |
| LTR elements    | 28,262,816           | 1.78              | 84,049,288                 | 4.67              |
| DNA transposons | 175,148,224          | 11.04             | 157,677,814                | 8.76              |
| Unclassified    | 137,820,970          | 8.69              | 34,170,372                 | 1.90              |
| <b>Total</b>    | <b>720,636,774</b>   | <b>45.43</b>      | <b>585,842,587</b>         | <b>32.56</b>      |

245

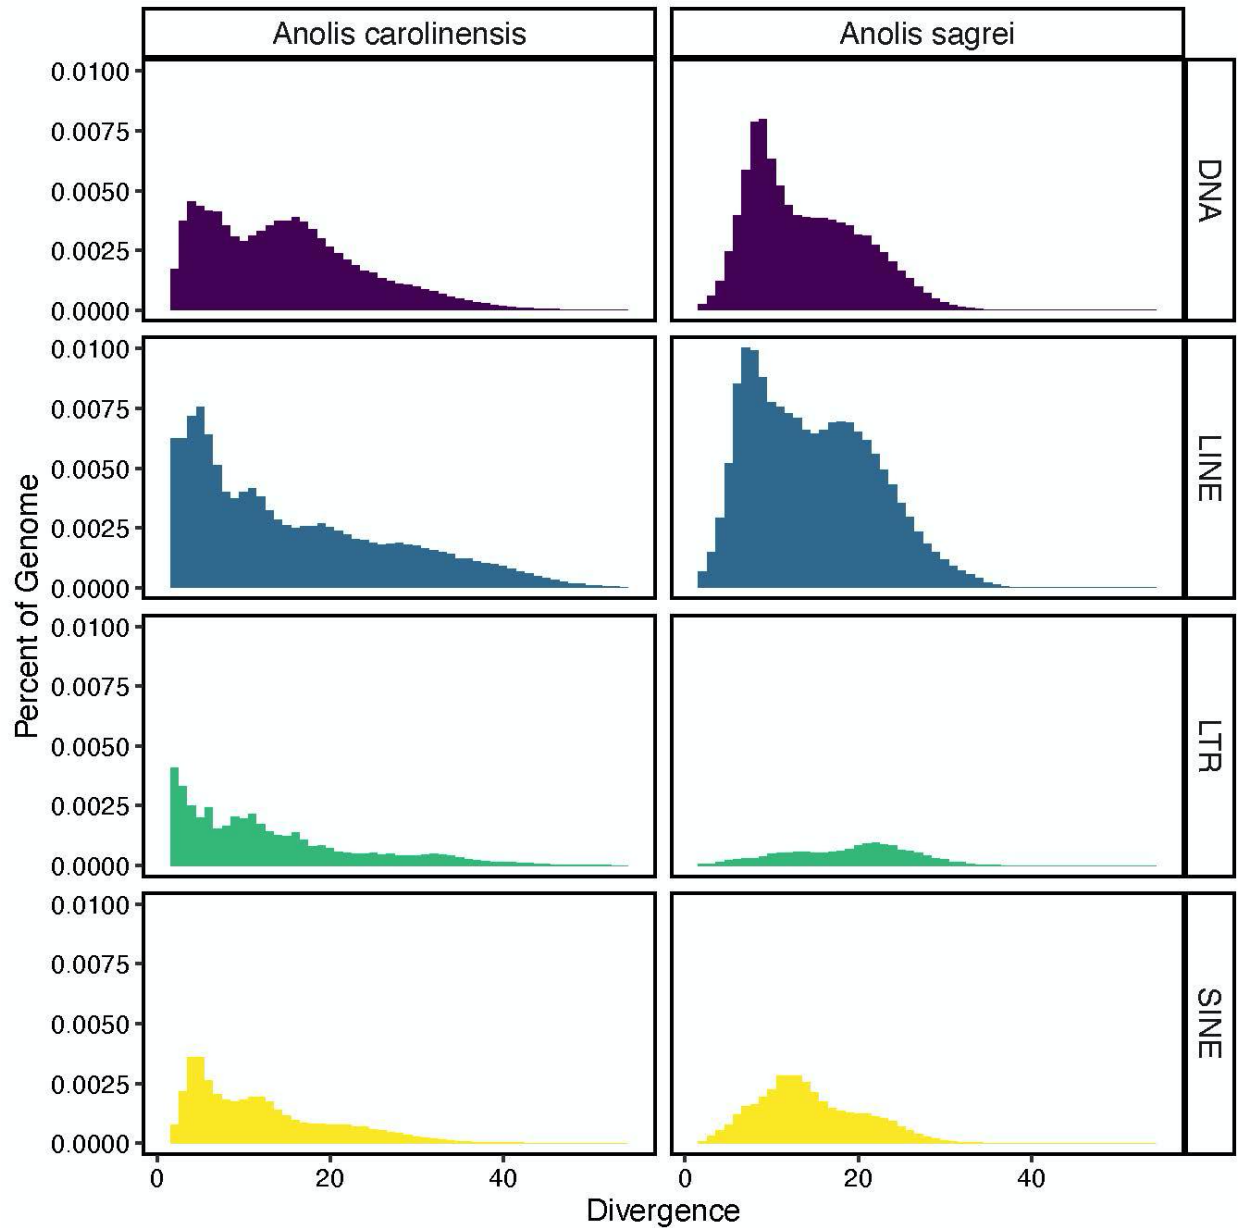

246  
247 **Figure 3. Comparison of repeat landscapes for the classes of transposable elements in *Anolis carolinensis* and**  
248 ***Anolis sagrei*.** The proportion of the genome consisting of transposable element insertions (short interspersed  
249 elements=SINE, long interspersed elements=LINE, long terminal repeat retrotransposons=LTR, and DNA  
250 transposons=DNA) of different ages according to their Kimura 2-parameter divergence from consensus. Older  
251 insertions are more divergent.

252  
253 *Synteny and Sex Chromosome analyses*

254 A growing body of evidence suggests that fusions between autosomes and sex chromosomes are  
255 common across anoles<sup>68,69</sup>. The chromosomes that result from such fusions, called neo-sex  
256 chromosomes, have been used to study multiple evolutionary processes, such as chromosomal  
257 degeneration<sup>70</sup> (or lack thereof) and dosage compensation<sup>71</sup>. *Anolis sagrei* has an XY sex  
258 determination system with sex chromosomes that are significantly larger than those from *A.*



259 *carolinensis*<sup>62,68</sup>. As Iguanian lizards (with the exception of Basilisks) share a highly conserved  
 260 core of X-linked genes<sup>72</sup>, the  
 261

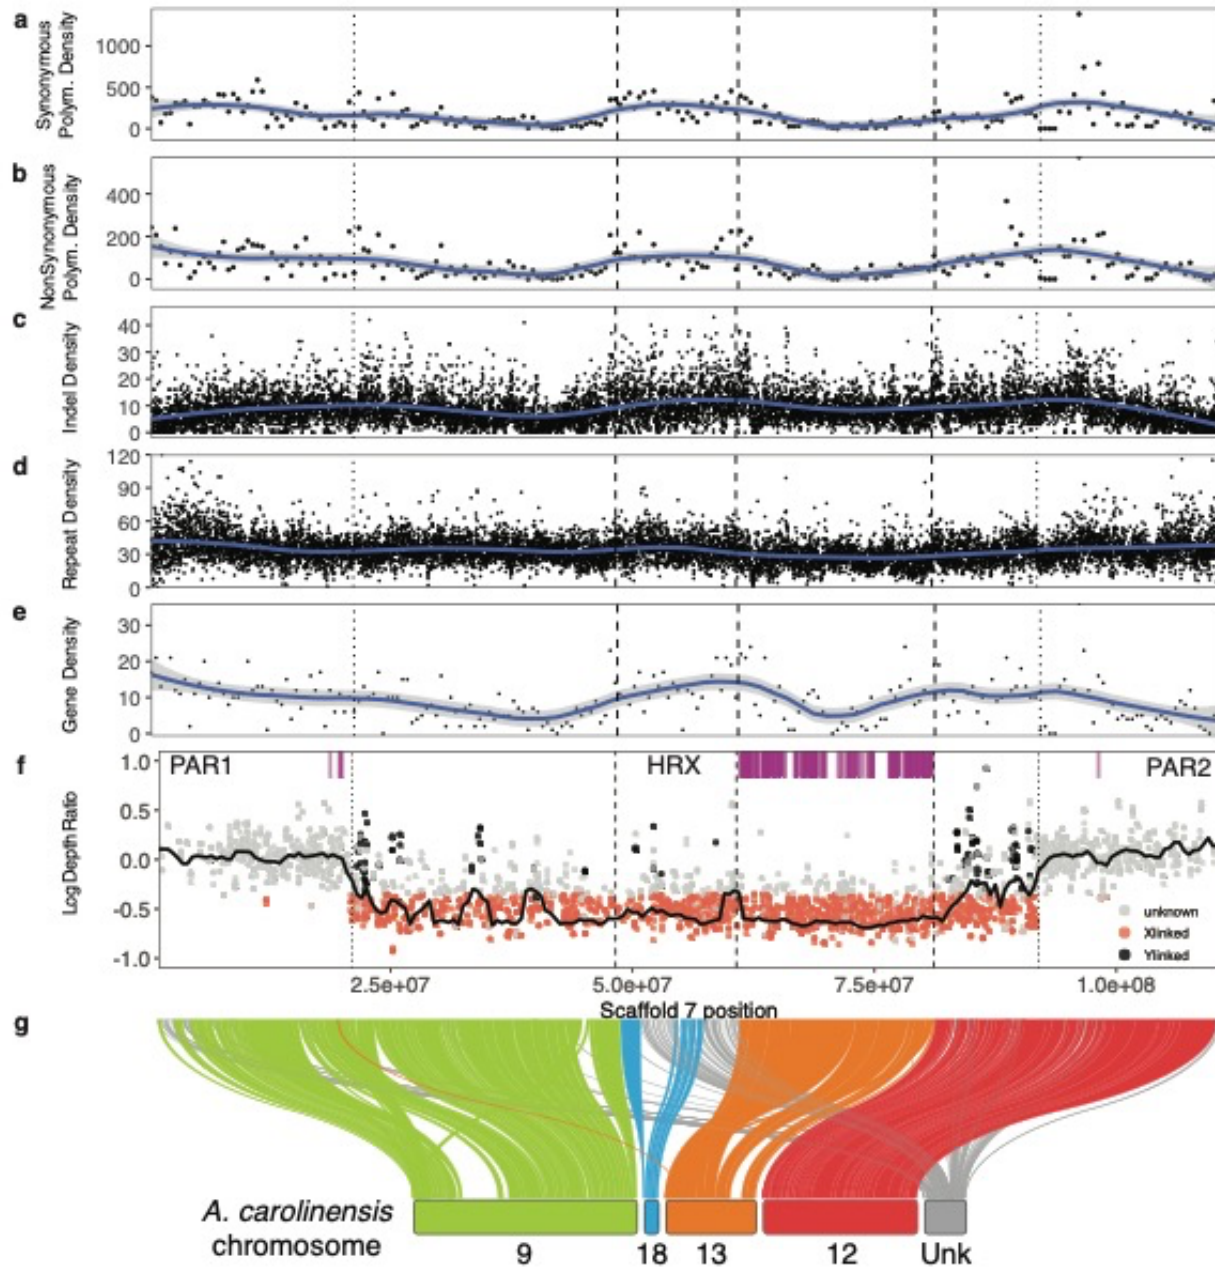

262  
 263 **Figure 4. Identification and analysis of the X chromosome.** a-e) sliding window plots of element density with  
 264 LOESS smoothed lines (span=0.25) of a) synonymous SNPs per 500kb, b) non- synonymous SNPs per 500kb, c)  
 265 indels per 10kb, d) Repetitive elements per 10kb, and e) Genes per 500kb. f) Scaffold 7 male/female depth ratio  
 266 (log-transformed). The black horizontal line summarizes depth ratio using a sliding window analysis (2Mb  
 267 windows, 500 kb step size). X-linked SNPs as those that are outliers for low sequencing depth ratio and show male  
 268 heterozygosity equal to or lower than female heterozygosity. Y-linked SNPs correspond to significant sex GWA  
 269 hits. Magenta ticks indicate the annotated location of *A. sagrei* homologs of X-linked genes in *A. carolinensis*. g)  
 270 Syntenic relationship between *A. sagrei* scaffold 7 and *A. carolinensis* chromosomes. For all panels, dashed lines  
 271 represent the boundaries between regions homologous to different *A. carolinensis* chromosomes and dotted lines

272 mark the estimated boundaries of pseudoautosomal regions (PAR1 and PAR2) and the putative Hemizygous Region  
273 of the X (HRX).

274

275 enlarged sex chromosomes in *A. sagrei* have been hypothesized to be the product of three  
276 independent fusions of autosomes to conserved iguanian X and Y sex chromosomes<sup>55,73</sup>. By  
277 aligning *A. sagrei* short reads from chromosomal flow sorting to the reference *A. carolinensis*  
278 genome, Giovannotti and colleagues<sup>62</sup> showed that the 7th largest chromosome in the *A. sagrei*  
279 karyotype was the product of a series of chromosomal fusion events that occurred in the *A.*  
280 *sagrei* lineage. Ancestral chromosomes homologous to *A. carolinensis*' chromosomes 9 and 12  
281 fused to chromosome 13, the X chromosome of *A. carolinensis* (henceforth 'ancient X'). Soon  
282 after, Kichigin and colleagues found that the chromosome corresponding to *A. carolinensis*  
283 chromosome 18 had also fused to the ancient X in the *A. sagrei* lineage<sup>56</sup>. These authors  
284 hypothesized that the neo-sex chromosome in *A. sagrei* resulted from three fusion events:  
285 chromosomes 12 and ancient X would have fused independently from chromosomes 9 and 18,  
286 and these two pairs of fused chromosomes then fused together to create the current *A. sagrei* XY  
287 system. Kichigan further proposed a synteny hypothesis for the *A. sagrei* neo-sex chromosomes  
288 in which the ancient X and chromosome 18 would be at the extremes of the neo-X chromosome,  
289 while chromosomes 12 and 9 would be in its center<sup>56</sup>.

290

291 Analyses of read depth, heterozygosity, and genome-wide association all indicate that  
292 AnoSag2.1 scaffold 7 is the X chromosome in this species (see *Sex Chromosome Identification*  
293 below). Using SatsumaSynteny, we aligned the *A. carolinensis* and *A. sagrei* genomes and  
294 confirmed previously published predictions<sup>56,73</sup> that the X chromosome in *A. sagrei* is the product  
295 of fusions between chromosomes homologous to 9, 12 and 18 from the *A. carolinensis* assembly  
296 and the ancient X. Given the level of contiguity of the AnoSag2.1 scaffold 7, our results present  
297 a clear synteny prediction for not only the order of the *A. carolinensis* chromosomes in scaffold  
298 7, but also for the linkage groups that make up the ancient X in *A. carolinensis* (Fig. 4g). We  
299 found extensive overlap between the list of scaffolds identified in our synteny analyses and those  
300 obtained using short-read data from chromosomal flow sorting<sup>73</sup>. Furthermore, our data  
301 corroborated previous results based on dosage compensation, qPCR of X-linked genes and flow  
302 sorting in *A. carolinensis* that identified 8 additional scaffolds as X-linked in the original *A.*  
303 *carolinensis* assembly<sup>11,56,74,75</sup>.

304

305 Although our synteny data confirmed the identity of the ancestral chromosomes that fused to the  
306 ancient X to make up *A. sagrei*'s neo-sex chromosomes, our results do not support previous  
307 predictions of how these chromosomes are ordered within the *A. sagrei* neo-X chromosome. Our  
308 data suggest that chromosomes 18 and the ancient X are fused together at the center rather than  
309 at the extremes of scaffold 7 (Fig. 4g). In addition, only minor rearrangements are evident within  
310 formerly autosomal chromosomes, which suggests high levels of synteny within chromosomes  
311 despite their fusion to each other and the ancient X (Fig. 4).

312

313 We found that all 9 linkage groups that had been previously assigned to the ancient X aligned to  
314 a 20.35 Mb stretch near the center of scaffold 7 (Table S4). LGb, the first region in the *A.*  
315 *carolinensis* genome identified as X-linked, and GL343282.1 are the only linkage groups with  
316 more than one alignment to scaffold 7. LGb's other alignment is relatively short (~1.6 Mb) and is  
317 located in one of two hypothesized pseudoautosomal regions (see below); GL343282.1's other  
318 hit, on the other hand, is also within the boundaries of the region homologous to the ancient X

319 (see Table S5). In addition to partially corroborating Kichigin and colleagues<sup>56</sup> hypothesis and  
320 predicting a new order for the ancestral autosomes along *A. sagrei*'s neo-sex chromosome  
321 system (including the ancient X), our syntenic alignment also identified an additional 142  
322 linkage groups from the *A. carolinensis* assembly as being X-linked in *A. sagrei*'s scaffold 7  
323 (Table S5).

324  
325 Our results, therefore, corroborate the hypothesis that the XY system in *A. sagrei* is composed of  
326 neo-sex chromosomes that originated through the fusion of chromosomes homologous to  
327 chromosomes 9, 12, 18 and the X in the *A. carolinensis* karyotype<sup>56</sup>. Furthermore, the high  
328 contiguity of scaffold 7 led us to hypothesize a new arrangement of these formerly autosomal  
329 chromosomes in the *A. sagrei* neo-X chromosome.

### 330 331 *Sex Chromosome Identification*

332 Previous studies have indicated that *A. sagrei* has a male heterogametic sex chromosome  
333 system<sup>68,69,76</sup>. The sex chromosomes of this species are thought to be represented either by  
334 microchromosomes<sup>76,77</sup> or by macrochromosomes<sup>62</sup>. Our synteny-based analyses (above) suggest  
335 that scaffold 7 is the X chromosome in *A. sagrei*. To independently verify which of the  
336 chromosomes in the *A. sagrei* genome are sex-linked, we used double-digest restriction site  
337 associated (ddRAD) data for 50 males and 50 females drawn from 16 populations distributed  
338 across the native and introduced ranges of *A. sagrei* (Table S6). This method has previously been  
339 shown to perform well for sex chromosome identification in anoles<sup>78</sup> and other taxa<sup>79</sup>.

340  
341 After quality filtering, we retained an average of 2.3 M read pairs per sample, with no difference  
342 observed for males and females ( $P = 0.81$ ; Wilcoxon rank sum test). The GWAS analysis  
343 performed using the final 120,967 filtered SNP set identified 204 markers distributed on  
344 scaffolds 1, 2, 3, 5, 6, and 7 as significantly associated with sex (Fig. S1a). Of these, the majority  
345 (i.e., 190 SNPs; 93.1%) were clustered on scaffold 7, where we also identified the strongest  
346 associations (Fig. S1a, b). Most (96%) significant GWAS hits showed an excess of  
347 heterozygosity in males relative to females (Fig. S1c, d), as expected if they are linked with the  
348 Y chromosome. Compared to the significant associations on scaffold 7, those occurring on  
349 scaffolds 1-6 showed an excess of sequencing coverage in males relative to females (Fig. S1c,  
350 d,e). Therefore, a reasonable interpretation is that these SNPs correspond to regions of the  
351 genome that have been duplicated between the autosomes and the Y chromosome.

352  
353 Analysis of sequencing depth further supported our interpretation that scaffold 7 is the sex  
354 chromosome in *A. sagrei*. Specifically, scaffold 7 contains 89.6% of the genomic outliers with  
355 lower coverage in males compared to females (Fig. 4g). This result is consistent with  
356 heterogamety in *A. sagrei*, and with X-linkage of sequencing depth outliers. X-linked SNPs are  
357 clustered along a 71 Mb region on scaffold 7, which also contains the Y-linked SNPs identified  
358 by GWAS (Fig. S1b).

359  
360 Collectively, these results indicate the 71 Mb region on scaffold 7 corresponds to the putative  
361 Hemizygous Region of the X chromosome (HRX) in *A. sagrei*. The 21 Mb to the left of the  
362 HRX, and the 19 Mb to the right of the HRX mostly contain markers with even coverage  
363 between males and females. We infer that these correspond to recombining pseudoautosomal  
364 regions (PAR1 and PAR2; Fig. 4f). These pseudoautosomal regions (PARs) appear to have

365 evolved *de novo* since the divergence of *A. sagrei* and *A. carolinensis* as virtually all the  
366 ancestral X chromosome (and therefore the ancestral PARs) lies outside of the PAR in *A. sagrei*.  
367 A similar – but far more ancient – event has been hypothesized to have occurred in eutherian  
368 mammals where one of the two PARs present in these species arose after the divergence of  
369 monotremes and placental mammals 80-130 million years ago<sup>80</sup>. Two recent studies place the  
370 divergence of *A. sagrei* and *A. carolinensis* at less than 50 million years ago<sup>81,82</sup> suggesting that  
371 *A. sagrei* has evolved two new PARs in roughly half the time placental mammals evolved one.  
372

373 As discussed above, we detected broad sequence homology between *A. sagrei* scaffold 7 and  
374 nine X-linked *A. carolinensis* scaffolds which together contain 272 gene models in the NCBI  
375 RefSeq<sup>83</sup> *A. carolinensis* annotation (release 102). We found 227 orthologous gene models in our  
376 annotation of *A. sagrei*. The vast majority (224; 99%) of these appear on scaffold 7 in  
377 AnoSag2.1. Only three genes are annotated to occur on other scaffolds (*gal3st1*, *iscu*, and *iqcd*  
378 on scaffolds 2,6, and 9 respectively). Most of these genes occur exclusively on scaffold 7,  
379 however, 17 genes have paralogs occurring both on scaffold 7 and another scaffold. Of the 224  
380 genes on scaffold 7, all of them have at least one copy within the region homologous to the *A.*  
381 *carolinensis* X, chromosome 13 (Fig 4f). Duplicate copies of two genes also occur elsewhere on  
382 scaffold 7. A single copy of *dnah10* is present in PAR1 and three copies of *cmklr1* occur in  
383 PAR1 and one copy in PAR2 (Table S7). In mammals and flies the duplication or movement of  
384 genes to regions outside HRX have been observed and have been hypothesized to be associated  
385 with either dosage compensation or male-specific function. However, we are unable to find  
386 support for either hypothesis for these two genes.  
387

388

### 389 *X-autosome fusion*

390 The Y chromosome of *A. sagrei* is roughly two-thirds the size of the X<sup>62</sup>. This reduction is likely  
391 via the process of Y chromosome degeneration<sup>55,84</sup>. Under this process, formerly homologous  
392 regions in the Hemizygous Region of the X chromosome (HRX) of the X and Y diverge through  
393 mutational accumulation and deletions on the Y. The HRX is expected to evolve under different  
394 evolutionary pressures than those on autosomes or within pseudoautosomal regions on the sex  
395 chromosomes because, when they occur in males, these loci are effectively haploid. Recessive  
396 deleterious genetic variants such as indels, non-synonymous mutations, or repetitive element  
397 insertions are thus exposed to purifying natural selection in males and are therefore more likely  
398 to be purged from a population<sup>85</sup>. Similarly, the hemizyosity of the X chromosome may result in  
399 more efficient positive natural selection<sup>86,87</sup>. Since the *A. sagrei* neo-sex chromosomes are  
400 composed of ancient sex-linked sequences as well as more recently recruited former autosomes,  
401 we might expect variation in the density of variants among these regions, reflecting differences  
402 in the time they have been X-linked. Just such a phenomenon has been observed in the neo-X of  
403 *Drosophila miranda* where formerly autosomal portions of the X chromosome have reduced  
404 synonymous polymorphism due to repeated selective sweeps<sup>88</sup>. Indeed, our data suggest some  
405 gametologs on the X and Y have sufficiently diverged to allow detection of X- and Y-linked  
406 sequences in the HRX of *A. sagrei* (Fig 4f). However, the mapping of male-linked sequences to  
407 regions homologous to *A. carolinensis* chromosomes 9, 12, and 18 but not the X (chromosome  
408 13) reveals, unsurprisingly, that X-Y divergence is more substantial on the portion of the X  
409 chromosome that has been sex-linked the longest. We also observed differences in the density of  
410 indels, repetitive elements, genes, and synonymous and nonsynonymous polymorphisms among

411 the sub-compartments of the *A. sagrei* X chromosome; regions homologous to the ancient X  
412 have a lower density of each of these features than regions homologous to *A. carolinensis*  
413 autosomes (Figs 4a-e, S2). Future analyses, using population genetic data in contrast to the  
414 pooled sequencing performed here, would allow more detailed evaluation of the evolutionary  
415 dynamics at play on the *A. sagrei* X chromosome.

416

## 417 **Concluding Remarks**

418 We report a new, high-quality genome assembly of the brown anole, *Anolis sagrei*. Our analyses  
419 of this genome have revealed new insights into the lineage-specific accumulation of repetitive  
420 elements and the complex evolution of anole sex chromosomes, including multiple bouts of  
421 autosome-sex chromosome fusion. The highly contiguous nature of our assembly and its  
422 substantial completeness presents a community resource that will enable future and on-going  
423 work in this emerging model organism. The assembly and accompanying annotation of genes  
424 and genetic variation we report here make possible a wide array of analyses such as genetic  
425 mapping of traits (Bock et al. *accepted*, Feiner et al. in review) and functional genetics. Finally,  
426 the assembly serves as a launching point for future work probing the genome of this diverse  
427 species, including the assembly of the Y chromosome and population-scale analysis of structural  
428 evolution.

429

## 430 **Methods**

### 431 *Chosen Animal*

432 A single female *Anolis sagrei ordinatus* was chosen for sequencing. This animal was collected  
433 from the Conception Island Bank in the Eastern Bahamas. Mitochondrial sequencing from across  
434 the range of the species had previously revealed this population to have the lowest levels of  
435 nucleotide polymorphism<sup>89</sup> and was therefore best suited for *de novo* genome assembly. After  
436 humane euthanasia using Sodium Pentobarbital, we excised and flash froze muscle and liver  
437 tissue in liquid nitrogen. Flash frozen tissues were subsequently stored at -80°C. All animal work  
438 was performed under Harvard Institutional Animal Care and Use Committee Protocol 26-11.  
439 Research, collection, and export permissions were granted by the Bahamas Environment,  
440 Science and Technology Commission, the Bahamas Ministry of Agriculture and Marine  
441 Resources, and the Bahamas National Trust.

442

### 443 *Sequencing*

444 High Molecular Weight DNA was extracted from muscle and liver tissues using a Qiagen  
445 genomic tip kit. Two whole genome shotgun sequencing libraries were prepared using a TruSeq  
446 v3 DNA PCR-free library preparation kit with a 450bp insert between pairs.

447

448 Two Chicago libraries and three Dovetail HiC libraries were prepared following previously  
449 published protocols<sup>59,90</sup>. For Chicago libraries, ~500ng of DNA was reconstituted into chromatin  
450 *in vitro* and then fixed in formaldehyde. For HiC libraries chromatin was first fixed in place with  
451 formaldehyde in the nucleus and then extracted. The remaining steps for both protocols were  
452 identical. Fixed chromatin was digested with DpnII, creating 5' overhangs which were filled  
453 with biotinylated nucleotides followed by ligation of free blunt ends. Crosslinks were then  
454 reversed, and the DNA purified from protein. Purified DNA was treated to remove biotin that  
455 was not internal to ligated fragments. The DNA was then sheared to an average fragment size of  
456 350 bp and used to generate sequencing libraries using NEBNext Ultra enzymes and Illumina-

457 compatible adapters. Biotin-containing fragments were isolated using streptavidin beads before  
458 PCR enrichment of each library.

459  
460 The two whole genome shotgun (WGS) libraries were multiplexed and sequenced across two  
461 sequencing lanes. The two Chicago and three HiC libraries were multiplexed and sequenced  
462 across two additional lanes. All libraries were sequenced as paired end 150bp reads on the  
463 Illumina HiSeqX platform. A summary of the data generated from all sequencing approaches can  
464 be found in Table S8.

465  
466 *de novo Assembly*

467 We processed raw Illumina WGS reads using trimmomatic v.0.36<sup>91</sup>. We used ILLUMINACLIP  
468 to remove TruSeq3 v2 sequencing adapters. We then removed any nucleotides with quality  
469 scores less than 20 from the leading and trailing ends of each read. Next, reads were truncated  
470 from the ends if sliding windows of 13bp have an average quality below 20. Finally, we retained  
471 only reads longer than 23 nucleotides. For trimmed reads less than 23bp we removed both that  
472 read and its paired read. We retained 896 million read pairs after filtering. These reads were used  
473 as input for *de novo* assembly using meraculous v2.2.2.5<sup>58</sup> with the following parameters (diploid  
474 mode - diploid nonredundant haplotigs, kmer size 73, minimum kmer frequency 8).

475  
476 *Scaffolding*

477 We used the initial *de novo* assembly, Chicago library reads, and Dovetail HiC library reads as  
478 input data for HiRise v2.1.6-072ca03871cc, a software pipeline designed specifically for using  
479 proximity ligation data to scaffold genome assemblies<sup>59</sup>. We performed an iterative process of  
480 scaffolding. First, Chicago library sequences were aligned to the *de novo* input assembly from  
481 meraculous using a modified SNAP read mapper (<http://snap.cs.berkeley.edu>). The mapped  
482 separation of Chicago read pairs within draft scaffolds were analyzed by HiRise to produce a  
483 likelihood model for genomic distance between read pairs, and the model was used to identify  
484 and break putative misjoins, to score prospective joins, and make joins above a threshold. After  
485 aligning and scaffolding using Chicago data, HiC library sequences were aligned and used for  
486 scaffolding following the same method above but with the Chicago-scaffolded assembly as  
487 input.

488  
489 *AnoSag1.0*

490 Using the Chicago-scaffolded assembly as input we used abyss-sealer v2.02<sup>92</sup> with options “-v -  
491 j32 -s100G -k96 -k80 -k64 -k48 -P 50 -o run20 -B5000” to close 18.6% of gaps in the  
492 assembly, substituting 9 Mb of ambiguous sequence with determined bases and increased N50  
493 by 1.2Mb. Gap-filled scaffolds were ordered and named sequentially according to descending  
494 size.

495  
496 The total length of this assembly (1.6 Gb) was substantially smaller than the *Anolis carolinensis*  
497 assembly or cytological estimates of *A. sagrei* (~1.9 Gb), so we performed an additional round of  
498 improvement to identify missing sequences. Using bwa-mem v0.17<sup>93</sup>, we mapped the Illumina  
499 WGS PE reads generated in the project to the v1.0 assembly and extracted all unmapped reads.  
500 Approximately 2.5% of all read pairs either did not map or only a single read mapped. We then  
501 performed a *de novo* assembly using ABySS v2.02<sup>94</sup> using the unmapped paired and unpaired  
502 reads as input and a kmer size of 96, generating ~29K contigs. BLASTN v2.7.1<sup>95</sup> annotation of

503 these contigs against the NCBI nr database revealed that about half had a highest match to  
504 saurian sequences (14,360; of which 10,975 mapped to an *Anolis* accession). We reserved all  
505 contigs mapping to saurians and discarded all other contigs to avoid contaminant and  
506 metagenomic sequences. These contigs were appended to the final *sagrei* assembly and are  
507 numbered in descending size. The version 1.0 assembly including both gap-filled scaffolds and  
508 newly assembly and filtered contigs was composed of 28,096 elements (scaffolds plus contigs)  
509 totaling 1.62Gb in length.

510

#### 511 *AnoSag2.0*

512 During quality control checks of the v1.0 assembly, we discovered an issue that led us to further  
513 refine the assembly. Specifically, while spot checking the annotation of deeply conserved  
514 developmental genes, we discovered that while our assembly placed exons in the same order as  
515 other vertebrate genomes the orientation of exons within genes varied substantially. This seems  
516 to be caused by the inability of scaffolding software to determine the orientation of some contigs  
517 while performing scaffolding using Chicago and HiC data<sup>96</sup>. To correct this issue, we generated  
518 additional long read Pacific Biosciences data, broke the assembly back into contigs, and re-  
519 scaffolded.

520

#### 521 *High Molecular Weight DNA isolation and sequencing*

522 High-molecular-weight genomic DNA was extracted from the muscle tissue of the same female  
523 *A. sagrei ordinatus* used for all previous sequencing. Frozen muscle tissue was homogenized  
524 with a pestle in freshly made lysis buffer (0.1 mM Tris, 1% Polyvinylpyrrolidone 40, 1% Sodium  
525 metabisulfite, 500 mM NaCl, 50 mM EDTA, 1.25% SDS, pH 8.0) and incubated with proteinase  
526 K at 55°C for 50 minutes prior to RNase A treatment at room temperature for 10 minutes<sup>97</sup>. Next,  
527 one-third volume of 5M potassium acetate was added, and the solution was incubated at 4°C for  
528 5 minutes and pelleted by centrifugation. The DNA in the supernatant was bound to SPRSelect  
529 beads (Beckman Coulter Life Sciences), washed and eluted in elution buffer (10 mM Tris, pH  
530 8.0) according to the manufacturer's instructions. Throughout the extraction process, the  
531 solutions were manipulated gently to minimize shearing of DNA.

532

#### 533 *PacBio Sequencing*

534 A SMRTbell library was constructed using the SMRTbell Template Prep Kit 1.0 (Pacific  
535 Biosciences) and sequenced on the Sequel I platform using Sequel Sequencing Kit 2.1 (Pacific  
536 Biosciences, Sequel SMRT Cell 1M v2). Two sequencing runs generated a total of 1,257,251  
537 reads, with an average size of 18 kb.

538

#### 539 *PacBio Contig Extension and Bridging*

540 The Illumina short read data generated for the initial *de novo* assembly (see above) were used to  
541 correct errors in PacBio long reads using Proovread v2.14.1<sup>98</sup>. As a trade-off between run time  
542 and accuracy, 40x short read coverage was used during error-correction. The resulting  
543 untrimmed error-corrected PacBio reads were subjected to additional hybrid error correction  
544 with FMLRC<sup>99</sup> before being used to extend and bridge the original contigs from the *AnoSag1.0*  
545 assembly. The *AnoSag1.0* genome assembly was reverted to contigs by breaking scaffolds at any  
546 gap of 100bp or more. The resulting contigs were extended and bridged using error-corrected  
547 PacBio reads using SSPACE-LongRead scaffolder v1.1<sup>100</sup>. Redundant contigs were removed  
548 using *fasta2homozygous.py*, a python script from Redundans v0.14a<sup>101</sup>. BUSCO assessments

549 using the vertebrata dataset (vertebrata\_odb9, containing 2586 highly conserved single-copy core  
550 vertebrate genes) were performed before and after the removal of redundant contigs to ensure  
551 that removing redundant contigs did not change the completeness of the genome assembly. Gaps  
552 in contigs were closed by LR Gapcloser<sup>102</sup>. Contigs were then re-scaffolded through two  
553 iterations of the HiRise pipeline using previously prepared Chicago and Hi-C libraries as  
554 described above to generate the version 2 *Anolis sagrei* genome assembly – AnoSag2.0. All  
555 programs were run using the recommended default settings.

#### 557 *AnoSag2.1*

558 We generated a link density histogram paired reads from our HiC library using Juicer v1.6<sup>61</sup>.  
559 Visualizing these data in Juicebox v1.11.08<sup>103</sup> revealed the second largest scaffold was in fact an  
560 intercalated fusion of two large scaffolds (Fig. S3). Through inspection of HiC link data as well  
561 as read mapping of Illumina short-read, RNA-Seq, and PacBio data, we identified three  
562 breakpoints on the AnoSag2.0 scaffold\_2 (positions 1-206,031,901; 206,031,902-209,142,770;  
563 209,142,7701-210,003,944; and 210,003,945-342,856,123) resulting in 4 fragments. We split the  
564 scaffolds at these locations and rejoined the first fragment to the third, and the second fragment  
565 to the fourth according to evidence from HiC link mapping. This resulted in the formation of two  
566 new scaffolds – the fifth and sixth largest in the new assembly. We sorted and renamed scaffolds  
567 by size to create the final AnoSag2.1 assembly reported here. We are making earlier assemblies  
568 (AnoSag1.0 and AnoSag2.0) publicly available because earlier research has been performed and  
569 published using those preliminary assemblies.

#### 571 *Mitochondrial Genome assembly*

572 The mitochondrial genome was absent from the AnoSag2.1 assembly. To assemble the  
573 mitochondrial genome, we first subsampled 1 million trimmomatic filtered and trimmed Illumina  
574 read pairs. These reads were used as input for a circular *de novo* assembly in Geneious v11.1.5  
575 (<https://www.geneious.com>). Separately, we extracted the largest subread (17.2 kb) from our  
576 error-corrected PacBio dataset. These two sequences were identical at the nucleotide level where  
577 they overlapped, but each contained regions absent in the other. To complete the mtGenome  
578 assembly we created a consensus of these two sequences and then aligned both PacBio and  
579 Illumina reads to that consensus to confirm reads from both platforms aligned to all regions. We  
580 annotated the mitochondrial genome assembly using the MITOS webserver<sup>104</sup>.

#### 582 *Chromosome Size analysis*

583 Using a recently published, high-resolution *Anolis sagrei* karyotype (Figure 1c from Giovannotti  
584 and colleagues<sup>62</sup>) we measured the size of each chromosome as it appeared in that figure. For each  
585 chromosome, we calculated the fraction of the total karyotype occupied by that chromosome for  
586 an XX individual and multiplied that fraction by the total size of the AnoSag2.1 assembly to  
587 generate an estimate of nucleotide content. These estimates were then compared against the  
588 number of nucleotides in each size sorted AnoSag2.1 scaffold (Table S9). We calculated the  
589 correlation between scaffold size and estimated chromosome size via linear regression using the  
590 lm function in R v3.6<sup>105</sup>.

#### 592 *Repetitive Element Content*

593 To estimate the repetitive landscape of the *Anolis sagrei* genome, we modeled repeats *de novo* on  
594 the assembly using RepeatModeler v1.08<sup>106</sup> and annotated the repeat consensus sequences using



595 RepeatMasker v4.0.7<sup>107</sup>. To understand the age distribution of transposable elements in each  
596 genome, we used the divergence of an insert from its family consensus as a proxy for its age. We  
597 generated alignments for each repeat family and calculated the Kimura-2 parameter divergence  
598 from consensus (correcting for CpG sites) using the calcDivergenceFromAlign.pl RepeatMasker  
599 tool. We compared the repetitive profiles of *A. sagrei* and *A. carolinensis* through a parallel  
600 analysis, running RepeatModeler and RepeatMasker with the AnoCar2.0 assembly<sup>19</sup>.

601

#### 602 *Gene Model Annotation*

603 For gene structure annotation of AnoSag2.1, we ran Braker v2.0.5<sup>67</sup> using RNA-Seq data and  
604 amino acid sequences of closely related species. In brief, we used RepeatModeler v1.0.11<sup>106</sup> to  
605 construct an *Anolis sagrei* repeat library, which was subsequently used by RepeatMasker  
606 v1.0.11<sup>107</sup> to mask repeats in the genome. We used protein sequences of *A. carolinensis* and *A.*  
607 *punctatus* obtained from NCBI RefSeq to query our reference sequence for homologous proteins.  
608 Composite RNA-seq data were prepared by combining eight paired-end RNA-Seq libraries  
609 consisting of two libraries from a forelimb and a hindlimb at embryonic stage 7<sup>108</sup>, three libraries  
610 from brain, liver, and skin tissue of an adult female<sup>109</sup> (SRA accession number: DRA004457),  
611 and three libraries from central, nasal, and temporal regions of eye retina at embryonic stage  
612 16.5. These RNA-seq reads were aligned to AnoSag2.0 using TopHat v2.1.1<sup>110</sup> with the option --  
613 b2-very-sensitive<sup>110</sup>. The Braker gene prediction pipeline was run with the options "--  
614 softmasking --prg=gth --gth2traingenes".

615

616 CD-HIT v4.6.8<sup>111,112</sup> was used with default parameters to remove redundant gene models from  
617 Braker's output. Using the protein sequences of non-redundant gene models from CD-HIT as a  
618 query, BLASTP v2.7.1<sup>95</sup> searches were performed against the non-redundant RefSeq protein  
619 database. Gene models with unique protein matches and e-value less than 1e-3 were kept. When  
620 more than one gene model had blast hits with the same protein, the gene model with the best  
621 score was kept. In addition, we retained gene models that lacked a blast hit if they either 1)  
622 contained 3 or more exons or 2) had more than 50 RNA-seq reads per 15 million mapped reads  
623 and did not overlap with those from the non-redundant CD-HIT gene models already  
624 retained. Gene models from these processes were combined to generate a final non-redundant  
625 gene set. Approximately 15% of final gene models were spot checked and manually edited by  
626 cross-referencing Braker gene model annotations with aligned RNA-seq data.

627

#### 628 *SNP/Indels Genotyping*

629 We performed sequence variant calling with composite shotgun data by combining 75bp single-  
630 end Illumina reads from 5 genomic libraries originally generated as control data for *A. sagrei*  
631 ChIP-seq experiments. Each genomic library was created from a pool of embryos produced by a  
632 colony of wild-caught *A. sagrei* from Orlando, FL. The library details are as follows: library 1,  
633 57 embryos, 46.6 million reads; library 2, 59 embryos, 42.1 million reads; library 3, 91 embryos,  
634 16.6 million reads; library 4, 97 embryos, 104 million reads; library 5, 70 embryos, 25.3 million  
635 reads (need to submit to GEO). Likewise, composite RNA-Seq data were generated by  
636 combining data from 27 RNA-Seq libraries from embryonic (forelimbs, hindlimbs, and retina)  
637 and adult tissues (brain, skin, and liver). Embryonic limb (GEO accession GSE128151) and adult  
638 tissue RNA-seq data (DDBJ Sequence Read Archive accession DRA004457) were previously  
639 published<sup>108,109</sup>. Anole eye RNA-seq datasets were generated from tissues from Sanger Stage 16.5  
640 embryos laid from wild-caught *A. sagrei* parents from Orlando, FL. Tissues from the nasal,

641 central, and temporal posterior regions of the eye were collected, and samples from 3 embryos  
642 (of mixed sex) were pooled together. Total RNA was isolated using the mirVana RNA Isolation  
643 Kit (ThermoFisher Scientific). Libraries were constructed with TruSeq Stranded mRNA Sample  
644 Prep Kit for Illumina and sequenced on the Illumina NextSeq 500 platform. Embryonic retina  
645 RNA-seq data were submitted to GEO (GEO accession GSE184570). The composite sequence  
646 data were aligned to the *A. sagrei* genome (AnoSag2.1) using BWA-mem v0.7.15<sup>93</sup> with the  
647 default parameters. The resulting alignment files (SAM format) were merged and converted into  
648 sorted BAM file using SAMtools v1.6<sup>13</sup> before duplicates  
649 were removed using Picard v2.16.0 (Broad Institute, 2019) MarkDuplicates with the options  
650 “MAX\_FILE\_HANDLES\_FOR\_READ\_ENDS\_MAP=1000 REMOVE\_DUPLICATES=true  
651 ASSUME\_SORTED=true VALIDATION\_STRINGENCY=LENIENT”. SAMtools mpileup was used to  
652 generate genotype likelihoods at each genomic position with coverage from the deduplicated  
653 BAM file. We used BCFtools v1.9<sup>14</sup> with the options “--keep-alts --multiallelic-  
654 caller --variants-only” to call and filter sequence variants. We further filtered single  
655 nucleotide variants using VCFTools v0.1.15<sup>15</sup> to have a minimum quality score of 25 and a  
656 minimum depth of 5 reads (commands “--minQ 25 --minDP 5”). Summaries of features per  
657 genomic window (indels, SNPs, genes, repetitive elements) were calculated using VCFTools and  
658 BEDTools v2.26<sup>16</sup>. The impact of single nucleotide variants was assessed using SNPeff v5.0<sup>17</sup>  
659 using default settings.

660

#### 661 *Analysis of X chromosome synteny*

662 We used SatsumaSynteny v2.0<sup>18</sup> to align scaffold 7 in the *A. sagrei* assembly to the *A.*  
663 *carolinensis* assembly version 2.0. Next, we used custom awk scripts to modify  
664 SatsumaSynteny’s default output to a bed format and used the Circos<sup>19</sup> function bundlelinks to  
665 merge adjacent links together. We used bundlelinks’ ‘strict’ flag, keeping only bundles that were  
666 within 1Mbp of each other and that were at least 1kbp in length. To make the linear synteny plot  
667 between *A. sagrei* scaffold 7 and the scaffolds in the *A. carolinensis* assembly, we used the R  
668 package RIdeogram<sup>20</sup> in R v3.6<sup>105</sup>. For plotting purposes, we labeled scaffolds that aligned to  
669 scaffold 7 as belonging to either chromosome 9, 12, 18 or the ancient X in the *A. carolinensis*  
670 assembly using information from previous flow sorting and dosage compensation studies in *A.*  
671 *carolinensis*<sup>11,62,74,75,121</sup>.

672

673 We assessed the synteny degree between the *A. sagrei* and *A. carolinensis* genomes using  
674 Satsuma v3.1.0<sup>18</sup>, an alignment software devised to deal with large queries and references.  
675 Satsuma works as follows. First, it breaks the query and the reference sequences into 4096bp  
676 chunks, by default, that overlap in one-quarter of their size. Then, it translates As, Cs, Ts and Gs  
677 into numeric signals that go through cross-correlation. Cross-correlation is calculated as a  
678 function of the displacement of one sequence’s signal relative to the other. It measures the  
679 similarity among two analog signals, the higher the cross-correlation value, the more bases  
680 match across the overlap and the stronger the signal. Next, Satsuma fine-tunes the alignment by  
681 keeping sequences that are at least 28 base-pairs long and have 45% matching. Then, Satsuma  
682 calculates an alignment probability model based on the aligned sequences length, identity, GC  
683 content and length, keeping alignments that have probability lower than 10<sup>-5</sup> of being random  
684 noise. After Satsuma identifies it proceeds with dynamic programming to merge overlapping  
685 blocks into alignments with gaps. To reduce computational time, Satsuma implements a ‘paper-

686 and-pencil game battleship' approach, in which it queries the vicinity of the alignment for more  
687 hits.

688

### 689 *Sex chromosome identification*

690 Libraries were made following the standard ddRAD protocol<sup>122</sup>. Briefly, we used the *SphI* HF  
691 and *EcoRI* HF restriction endonucleases (New England Biolabs) to digest genomic DNA. After  
692 size selection, we retained fragments of 500–660 bp. Libraries were pair-end sequenced (150 bp  
693 read length) on an Illumina HiSeq 4000 (Illumina, San Diego, CA, USA). We included ddRAD  
694 data for 50 males and 50 females, sequenced as part of a larger related project. These were  
695 obtained from 16 populations distributed across the native and introduced ranges of *A. sagrei*  
696 (Table S6). In selecting samples, we aimed for a balanced representation of both sexes for most  
697 populations.

698

699 Sequencing files were de-multiplexed using *ipyrad* v0.7.15<sup>123</sup>. We removed low-quality bases  
700 and Illumina adapters using Trimmomatic v0.36<sup>91</sup>. Cleaned reads were used for SNP calling  
701 within the dDocent v2.2.20 pipeline<sup>124</sup>. In dDocent, reads were aligned to the *A. sagrei* assembly  
702 using BWA v0.7.16a-r1181<sup>125</sup> at default parameters. We then performed joint variant calling  
703 using the 100 *A. sagrei* genotypes along with 925 other conspecific genotypes sequenced as part  
704 of related projects, in Freebayes v1.0.2<sup>126</sup>. The genotype calls for the 100 samples used here were  
705 filtered using vcfliib (<https://github.com/vcfliib/vcfliib>). We kept only biallelic SNPs with MAPQ  
706 scores > 20. For the remaining markers, we coded genotypes that were supported by fewer than  
707 four reads as missing data. We subsequently kept only SNPs with data in at least 70% of  
708 samples, and those with minor allele frequency larger than 5%.

709

710 To identify Y-linked genomic regions, we performed a genome-wide association study (GWAS)  
711 in PLINK v1.0.7<sup>127</sup>. Because *A. sagrei* is known to have a male heterogametic sex chromosome  
712 system<sup>62,68,76</sup>, SNPs associated with one sex should be in close linkage with the Y chromosome.  
713 Specifically, we expect these SNPs to represent differences that occur between X and Y  
714 gametologs. We coded sex as a binary case/control variable. Prior to the GWAS analysis, we  
715 imputed any remaining missing data in the filtered SNP set using BEAGLE v5.0 at default  
716 parameters<sup>128</sup>. For association testing, we used Fisher's exact test and set the genome-wide  
717 significance threshold using the Bonferroni correction for multiple comparisons (0.05/total  
718 number of tested markers). Further confirmation of GWAS results was obtained by calculating  
719 the difference in heterozygosity between males and females (i.e. relative male heterozygosity), at  
720 each SNP. This is because in a male-heterogametic system we expect SNPs occurring between  
721 gametologs to show an excess of heterozygosity.

722

723 To identify X-specific genomic regions, we used the ratio of sequencing coverage between males  
724 and females. In species with heteromorphic sex chromosomes such as *A. sagrei*, this metric  
725 should be effective in distinguishing between the autosomes and the X chromosome<sup>79</sup>. A ratio  
726 close to 1 is expected for autosomes, while a ratio of 0.5 is expected for the X chromosome, due  
727 to hemizyosity of males. For both sequencing depth ratio and relative male heterozygosity, we  
728 identified upper and lower thresholds for categorizing SNPs as genomic outliers using the  
729 interquartile range (IQR; upper/lower quartile +/- 1.5 IQR). We then defined X-linked SNPs as  
730 those that are outliers for low sequencing depth ratio and show male heterozygosity equal to or  
731 lower than female heterozygosity. Y-linked SNPs were defined as those with significant sex

732 GWA hits. Lastly, we used these SNP categories to identify the approximate boundaries of the  
733 PARs, by tallying the percent of sex-linked SNPs in 1Mb windows along scaffold 7 (Table S10).

734

735

### 736 **Acknowledgements**

737 Research, collection, and export permissions were granted by the Bahamas Environment,  
738 Science and Technology Commission, Bahamas National Trust, and the Bahamas Ministry of  
739 Agriculture and Marine Resources. Thank you to Alexis Harrison, Sofia Prado-Irwin, Shea  
740 Lambert, Dan Scantlebury, and Shannan Yates for their assistance in the field. We are grateful to  
741 Cory Hahn, Matthew Gage, Analisa Shields-Estrada, Jeff Breeze, and the postdoctoral fellows,  
742 graduate, and undergraduate students of the Losos lab for assisting with animal care. Thank you  
743 to Tonia Schwartz for providing advanced access to the *Sceloporus undulatus* genome for  
744 completeness and contiguity comparisons. All animal care procedures were approved by Harvard  
745 Institutional Animal Care and Use Committee Protocol 26-11. This work was supported by the  
746 National Science Foundation under grants DEB-1927194 to JBL and AJG, IOS-1827647 to  
747 DBM, and DEB-1927156 to DBM. Additionally, DGB was supported by a Natural Sciences and  
748 Engineering Research Council of Canada (NSERC) Postdoctoral Fellowship, and a Banting  
749 Postdoctoral Fellowship. This project was also made possible, in part, through the support of a  
750 grant from the John Templeton Foundation and Human Frontiers grant RGP0030/2020 to JBL  
751 and DBM. The opinions expressed in this publication are those of the authors and do not  
752 necessarily reflect the views of the John Templeton Foundation.

753

### 754 **References**

- 755 1 Miga, K. H. *et al.* Telomere-to-telomere assembly of a complete human X chromosome.  
756 *Nature* **585**, 79-84 (2020).
- 757 2 Chang, C.-H. *et al.* Islands of retroelements are major components of Drosophila  
758 centromeres. *PLOS Biology* **17**, e3000241, doi:10.1371/journal.pbio.3000241 (2019).
- 759 3 Rhoads, A. & Au, K. F. PacBio sequencing and its applications. *Genomics, proteomics &*  
760 *bioinformatics* **13**, 278-289 (2015).
- 761 4 Schield, D. R. *et al.* The origins and evolution of chromosomes, dosage compensation,  
762 and mechanisms underlying venom regulation in snakes. *Genome Research* **29**, 590-601,  
763 doi:10.1101/gr.240952.118 (2019).
- 764 5 Pasquesi, G. I. M. *et al.* Squamate reptiles challenge paradigms of genomic repeat  
765 element evolution set by birds and mammals. *Nature Communications* **9**, 2774,  
766 doi:10.1038/s41467-018-05279-1 (2018).
- 767 6 Feiner, N. Evolutionary lability in Hox cluster structure and gene expression in Anolis  
768 lizards. *Evolution Letters* **3**, 474-484, doi:10.1002/evl3.131 (2019).
- 769 7 Hodson, C. N., Jaron, K. S., Gerbi, S. & Ross, L. Evolution of gene-rich germline  
770 restricted chromosomes in black-winged fungus gnats through introgression (Diptera:  
771 Sciaridae). *bioRxiv*, 2021.2002.2008.430288, doi:10.1101/2021.02.08.430288 (2021).
- 772 8 Fan, H. *et al.* Chromosome-level genome assembly for giant panda provides novel  
773 insights into Carnivora chromosome evolution. *Genome biology* **20**, 1-12 (2019).
- 774 9 Mahajan, S., Wei, K. H.-C., Nalley, M. J., Gibilisco, L. & Bachtrog, D. De novo  
775 assembly of a young Drosophila Y chromosome using single-molecule sequencing and  
776 chromatin conformation capture. *PLoS biology* **16**, e2006348 (2018).

- 777 10 Rovatsos, M. & Kratochvil, L. Evolution of dosage compensation does not depend on  
778 genomic background. *Mol Ecol* **30**, 1836-1845, doi:10.1111/mec.15853 (2021).
- 779 11 Rupp, S. M. *et al.* Evolution of Dosage Compensation in *Anolis carolinensis*, a Reptile  
780 with XX/XY Chromosomal Sex Determination. *Genome Biol Evol* **9**, 231-240,  
781 doi:10.1093/gbe/evw263 (2017).
- 782 12 Rhie, A. *et al.* Towards complete and error-free genome assemblies of all vertebrate  
783 species. *Nature* **592**, 737-746, doi:10.1038/s41586-021-03451-0 (2021).
- 784 13 Koepfli, K.-P., Paten, B., Genome, K. C. o. S. & O'Brien, S. J. The Genome 10K Project:  
785 a way forward. *Annual review of animal biosciences* **3**, 57-111, doi:10.1146/annurev-  
786 animal-090414-014900 (2015).
- 787 14 Twyford, A. D. The road to 10,000 plant genomes. *Nature Plants* **4**, 312-313,  
788 doi:10.1038/s41477-018-0165-2 (2018).
- 789 15 Tang, H. *et al.* Synteny and Collinearity in Plant Genomes. *Science* **320**, 486-488,  
790 doi:10.1126/science.1153917 (2008).
- 791 16 Flicek, P., Keibler, E., Hu, P., Korf, I. & Brent, M. R. Leveraging the Mouse Genome for  
792 Gene Prediction in Human: From Whole-Genome Shotgun Reads to a Global Synteny  
793 Map. *Genome Research* **13**, 46-54, doi:10.1101/gr.830003 (2003).
- 794 17 Montgomery, T. H. *A study of the chromosomes of the germ cells of metazoa.* (1901).
- 795 18 Losos, J. B. *Lizards in an Evolutionary Tree: Ecology and Adaptive Radiation of Anoles.*  
796 (University of California Press, 2009).
- 797 19 Alföldi, J. *et al.* The genome of the green anole lizard and a comparative analysis with  
798 birds and mammals. *Nature* **477**, 587-591, doi:10.1038/nature10390 (2011).
- 799 20 Williams, E. E. The ecology of colonization as seen in the zoogeography of anoline  
800 lizards on small islands. *The Quarterly Review of Biology* **44**, 345-389 (1969).
- 801 21 Henderson & Powell. *Amphians and Reptiles of the West Indies.* (2009).
- 802 22 Reynolds, R. G. *et al.* Phylogeographic and phenotypic outcomes of brown anole  
803 colonization across the Caribbean provide insight into the beginning stages of an adaptive  
804 radiation. *Journal of Evolutionary Biology* **33**, 468-494, doi:10.1111/jeb.13581 (2020).
- 805 23 van Wagensveld, T. P. & Questel, K. Cuban Brown Anole (*Anolis sagrei*) established on  
806 Anguilla. *Reptiles & Amphibians* **25**, 162-163 (2018).
- 807 24 Powell, R., Henderson, R. W. & Farmer, M. C. Introduced amphibians and reptiles in the  
808 greater Caribbean: Patterns and conservation implications. ... *of Caribbean island ...*, 63-  
809 144, doi:10.1163/ej.9789004183957.i-228.38 (2011).
- 810 25 Fisher, S. R., Del Pinto, L. A. & Fisher, R. N. Establishment of brown anoles (*Anolis*  
811 *sagrei*) across a southern California county and potential interactions with a native lizard  
812 species. *PeerJ* **8**, e8937 (2020).
- 813 26 Batista, A., Ponce, M., Garcés, O., Lassiter, E. & Miranda, M. Silent pirates: *Anolis*  
814 *sagrei* Duméril & Bibron, 1837 (Squamata, Dactyloidae) taking over Panama City,  
815 Panama. *Check List* **15**, 455 (2019).
- 816 27 Amador, L., Ayala-Varela, F., Nárvaez, A. E., Cruz, K. & Torres-Carvajal, O. First  
817 record of the invasive Brown Anole, *Anolis sagrei* Duméril & Bibron, 1837 (Squamata:  
818 Iguanidae: Dactyloinae), in South America. *Check List* **13**, 2083 (2017).
- 819 28 Stroud, J. T., Giery, S. T. & Outerbridge, M. E. Establishment of *Anolis sagrei* on  
820 Bermuda represents a novel ecological threat to Critically Endangered Bermuda skinks  
821 (*Plestiodon longirostris*). *Biological Invasions*, 1-9, doi:10.1007/s10530-017-1389-1  
822 (2017).

- 823 29 Stroud, J. T., Richardson, A. J., Sim, J., Airnes, A. & Stritch, J. M. Onward to the Mid-  
824 Atlantic: First records of Cuban brown anoles (*Anolis sagrei*) on Ascension Island.  
825 *Reptiles & Amphibians* **25**, 220-222 (2018).
- 826 30 Goldberg, S. R., Kraus, F. & Bursey, C. R. Reproduction in an introduced population of  
827 the brown anole, *Anolis sagrei*, from O'ahu, Hawai'i. *Pacific Science* **56**, 163-168,  
828 doi:10.1353/psc.2002.0014 (2002).
- 829 31 Sanger, T. J., Pm, H., Johnson, M. A., Diani, J. & Losos, J. B. Laboratory Protocols for  
830 Husbandry and Embryo Collection of *Anolis* Lizards. *Herpetological Review* **39**, 58-63,  
831 doi:papers3://publication/uuid/2E4CD7E0-5C43-4465-AE59-0C32CA979A05 (2008).
- 832 32 De Meyer, J. *et al.* in *th Anole Newsletter* (eds James T. Stroud, Anthony J. Geneva, &  
833 Jonathan B. Losos) 1-26 (2019).
- 834 33 Losos, J. B. Integrative Approaches to Evolutionary Ecology: *Anolis* Lizards as Model  
835 Systems. *Annual Review Of Ecology And Systematics* **25**, 467-493,  
836 doi:10.1146/annurev.es.25.110194.002343 (1994).
- 837 34 Losos, J. B. & Pringle, R. M. Competition, predation and natural selection in island  
838 lizards. *Nature* **475**, E1-E2, doi:papers3://publication/doi/10.1038/nature10140 (2011).
- 839 35 Pringle, R. M. *et al.* Predator-induced collapse of niche structure and species coexistence.  
840 *Nature* **570**, 58-64, doi:10.1038/s41586-019-1264-6 (2019).
- 841 36 Schoener, T. W. & Schoener, A. Ecological and demographic correlates of injury rates in  
842 some Bahamian *Anolis* lizards. *Copeia* **1980**, 839,  
843 doi:papers3://publication/doi/10.2307/1444463 (1980).
- 844 37 Lapidra, O., Schoener, T. W., Leal, M., Losos, J. B. & Kolbe, J. J. Predator-driven  
845 natural selection on risk-taking behavior in anole lizards. *Science* **360**, 1017-1020,  
846 doi:10.1126/science.aap9289 (2018).
- 847 38 Lapidra, O., Chejanovski, Z. & Kolbe, J. J. Urbanization and biological invasion shape  
848 animal personalities. *Glob Chang Biol* **23**, 592-603, doi:10.1111/gcb.13395 (2017).
- 849 39 Sanger, T. J., Losos, J. B. & Gibson-Brown, J. J. A developmental staging series for the  
850 lizard genus *Anolis*: a new system for the integration of evolution, development, and  
851 ecology. *Journal of Morphology* **269**, 129-137,  
852 doi:papers3://publication/doi/10.1002/jmor.10563 (2008).
- 853 40 Tiatragul, S., Kurniawan, A., Kolbe, J. J. & Warner, D. A. Embryos of non-native anoles  
854 are robust to urban thermal environments. *J Therm Biol* **65**, 119-124,  
855 doi:10.1016/j.jtherbio.2017.02.021 (2017).
- 856 41 Warner, D. & Moody, M. Egg environments have large effects on embryonic  
857 development, but have minimal consequences for hatchling phenotypes in an invasive  
858 lizard. ... *Journal of the ...* **105**, 25-41, doi:10.1111/j.1095-8312.2011.01778.x (2012).
- 859 42 Warner, D. & Moody, M. Is water uptake by reptilian eggs regulated by physiological  
860 processes of embryos or a passive hydraulic response to developmental environments?  
861 *Comparative Biochemistry and ...* **160**, 421-425, doi:10.1016/j.cbpa.2011.07.013 (2011).
- 862 43 Park, S., Infante, C. R., Rivera-Davila, L. C. & Menke, D. B. Conserved regulation of  
863 *hoxc11* by *pitx1* in *Anolis* lizards. *J Exp Zool B Mol Dev Evol* **322**, 156-165,  
864 doi:10.1002/jez.b.22554 (2014).
- 865 44 D'Agostino, E. R. R., Donihue, C. M., Losos, J. B. & Geneva, A. J. ASSESSING THE  
866 EFFECTS OF GENETIC DIVERGENCE AND MORPHOLOGY ON ANOLIS  
867 LIZARD MATING. *BioOne* **568**, 1-15, doi:papers3://publication/doi/10.3099/0006-  
868 9698-568.1.1.short (2020).

- 869 45 Driessens, T. *et al.* Climate-related environmental variation in a visual signalling device:  
870 the male and female dewlap in *Anolis sagrei* lizards. *Journal of Evolutionary Biology* **30**,  
871 1846-1861, doi:10.1111/jeb.13144 (2017).
- 872 46 Tokarz, R. R., McMann, S., Smith, L. C. & John-Alder, H. Effects of testosterone  
873 treatment and season on the frequency of dewlap extensions during male-male  
874 interactions in the lizard *Anolis sagrei*. *Horm Behav* **41**, 70-79,  
875 doi:10.1006/hbeh.2001.1739 (2002).
- 876 47 Baeckens, S., Driessens, T. & Van Damme, R. The brown anole dewlap revisited: do  
877 predation pressure, sexual selection, and species recognition shape among-population  
878 signal diversity? *PeerJ* **6**, e4722, doi:10.7717/peerj.4722 (2018).
- 879 48 Kolbe, J., Leal, M. & Schoener, T. Founder Effects Persist Despite Adaptive  
880 Differentiation: A Field Experiment with Lizards. *Science* **335**, 1086-1089,  
881 doi:papers3://publication/doi/10.1126/science.1209566 (2012).
- 882 49 Kolbe, J. J., Larson, A., Losos, J. B. & de Queiroz, K. Admixture determines genetic  
883 diversity and population differentiation in the biological invasion of a lizard species.  
884 *Biology letters* **4**, 434-437, doi:papers3://publication/doi/10.1098/rsbl.2008.0205 (2008).
- 885 50 Kolbe, J. J. *et al.* Genetic variation increases during biological invasion by a Cuban  
886 lizard. *Nature* **431**, 177-181, doi:papers3://publication/doi/10.1038/nature02807 (2004).
- 887 51 Bock, D. *et al.* Changes in selection pressure can facilitate hybridization during  
888 biological invasion. *PNAS* (in review).
- 889 52 Losos, J. B., Warheit, K. I. & Schoener, T. W. Adaptive differentiation following  
890 experimental island colonization in *Anolis* lizards. *Nature* **387**, 70-73,  
891 doi:10.1038/387070a0 (1997).
- 892 53 Kolbe, J. J., Leal, M., Schoener, T. W., Spiller, D. A. & Losos, J. B. Founder effects  
893 persist despite adaptive differentiation: a field experiment with lizards. *Science* **335**,  
894 1086-1089, doi:10.1126/science.1209566 (2012).
- 895 54 Logan, M. L., Cox, R. M. & Calsbeek, R. Natural selection on thermal performance in a  
896 novel thermal environment. *Proc Natl Acad Sci U S A* **111**, 14165-14169,  
897 doi:10.1073/pnas.1404885111 (2014).
- 898 55 Lisachov, A. P. *et al.* Genetic Content of the Neo-Sex Chromosomes in *Ctenonotus* and  
899 *Norops* (Squamata, Dactyloidae) and Degeneration of the Y Chromosome as Revealed by  
900 High-Throughput Sequencing of Individual Chromosomes. *Cytogenetic and Genome*  
901 *Research* **157**, 115-122, doi:papers3://publication/doi/10.1159/000497091 (2019).
- 902 56 Kichigin, I. G. *et al.* Evolutionary dynamics of *Anolis* sex chromosomes revealed by  
903 sequencing of flow sorting-derived microchromosome-specific DNA. *Molecular*  
904 *Genetics and Genomics* **291**, 1955-1966, doi:10.1007/s00438-016-1230-z (2016).
- 905 57 Rasys, A. M. *et al.* CRISPR-Cas9 Gene Editing in Lizards through Microinjection of  
906 Unfertilized Oocytes. *Cell Rep* **28**, 2288-2292 e2283, doi:10.1016/j.celrep.2019.07.089  
907 (2019).
- 908 58 Chapman, J. A. *et al.* Meraculous: de novo genome assembly with short paired-end reads.  
909 *PLoS One* **6**, e23501, doi:10.1371/journal.pone.0023501 (2011).
- 910 59 Putnam, N. H. *et al.* Chromosome-scale shotgun assembly using an in vitro method for  
911 long-range linkage. *Genome Research* **26**, 342-350,  
912 doi:papers3://publication/doi/10.1101/gr.193474.115 (2016).

- 913 60 De Smet, W. The nuclear Feulgen-DNA content of the vertebrates (especially reptiles), as  
914 measured by fluorescence cytophotometry, with notes on the cell and chromosome size.  
915 *Acta Zoologica et Pathologica Antverpiensia (Belgium)* **76**, 119-157 (1981).
- 916 61 Durand, N. C. *et al.* Juicer Provides a One-Click System for Analyzing Loop-Resolution  
917 Hi-C Experiments. *Cell Syst* **3**, 95-98, doi:10.1016/j.cels.2016.07.002 (2016).
- 918 62 Giovannotti, M. *et al.* New insights into sex chromosome evolution in anole lizards  
919 (Reptilia, Dactyloidae). *Chromosoma* **126**, 245-260, doi:10.1007/s00412-016-0585-6  
920 (2017).
- 921 63 Andrade, P. *et al.* Regulatory changes in pterin and carotenoid genes underlie balanced  
922 color polymorphisms in the wall lizard. *Proceedings of the National Academy of Sciences*  
923 **116**, 5633-5642, doi:10.1073/pnas.1820320116 (2019).
- 924 64 Westfall, A. K. *et al.* A chromosome-level genome assembly for the Eastern Fence  
925 Lizard ( *Sceloporus undulatus*), a reptile model for physiological and evolutionary  
926 ecology. **213**, 1-43, doi:10.1101/2020.06.06.138248 (2020).
- 927 65 Gemmell, N. J. *et al.* The tuatara genome reveals ancient features of amniote evolution.  
928 *Nature*, 1-26, doi:10.1038/s41586-020-2561-9 (2020).
- 929 66 Roscito, J. G. *et al.* The genome of the tegu lizard *Salvator merianae*: combining  
930 Illumina, PacBio, and optical mapping data to generate a highly contiguous assembly.  
931 *Gigascience* **7**, 587-513, doi:10.1093/gigascience/giy141 (2018).
- 932 67 Hoff, K. J., Lomsadze, A., Borodovsky, M. & Stanke, M. Whole-Genome Annotation  
933 with BRAKER. *Methods Mol Biol* **1962**, 65-95, doi:10.1007/978-1-4939-9173-0\_5  
934 (2019).
- 935 68 Gamble, T., Geneva, A. J., Glor, R. E. & Zarkower, D. *Anolis* sex chromosomes are  
936 derived from a single ancestral pair. *Evolution* **68**, 1027-1041, doi:10.1111/evo.12328  
937 (2014).
- 938 69 Rovatsos, M., Altmanová, M., Pokorná, M. & Kratochvíl, L. Conserved sex  
939 chromosomes across adaptively radiated *Anolis* lizards. *Evolution* **68**, 2079-2085 (2014).
- 940 70 Bachtrog, D. A dynamic view of sex chromosome evolution. *Current Opinion in*  
941 *Genetics & Development* **16**, 578-585, doi:10.1016/j.gde.2006.10.007 (2006).
- 942 71 Gu, L. & Walters, J. R. Evolution of Sex Chromosome Dosage Compensation in  
943 Animals: A Beautiful Theory, Undermined by Facts and Bedeviled by Details. *Genome*  
944 *Biology and Evolution* **9**, 2461-2476, doi:10.1093/gbe/evx154 (2017).
- 945 72 Altmanová, M. *et al.* All iguana families with the exception of basilisks share sex  
946 chromosomes. *Zoology (Jena)* **126**, 98-102, doi:10.1016/j.zool.2017.11.007 (2018).
- 947 73 Giovannotti, M. *et al.* New insights into sex chromosome evolution in anole lizards  
948 (Reptilia, Dactyloidae). *Chromosoma*, 1-16, doi:10.1007/s00412-016-0585-6 (2016).
- 949 74 Marin, R. *et al.* Convergent origination of a *Drosophila*-like dosage compensation  
950 mechanism in a reptile lineage. *Genome Research* **27**, 1974-1987,  
951 doi:10.1101/gr.223727.117 (2017).
- 952 75 Rovatsos, M., Altmanová, M., Pokorná, M. J. & Kratochvíl, L. Novel X-linked genes  
953 revealed by quantitative polymerase chain reaction in the green anole, *Anolis*  
954 *carolinensis*. *G3 (Bethesda)* **4**, 2107-2113, doi:10.1534/g3.114.014084 (2014).
- 955 76 De Smet, W. Description of the orcein stained karyotypes of 27 lizard species (Lacertilia,  
956 Reptilia) belonging to the families Iguanidae, Agamidae, Chameleontidae and  
957 Gekkonidae (Ascalabota). *Acta Zool. Pathol. Antverpiensia* **76**, 35-72 (1981).



- 958 77 Gorman, G. C. & Atkins, L. Chromosomal heteromorphism in some male lizards of the  
959 genus *Anolis*. *American Naturalist* **100**, 579-583,  
960 doi:papers3://publication/uuid/A515523A-C428-4A17-B24A-16297091656C (1966).
- 961 78 Gamble, T. & Zarkower, D. Identification of sex-specific molecular markers using  
962 restriction site associated DNA sequencing (RAD-seq). *Molecular Ecology Resources*,  
963 n/a-n/a, doi:10.1111/1755-0998.12237 (2014).
- 964 79 Palmer, D. H., Rogers, T. F., Dean, R. & Wright, A. E. How to identify sex chromosomes  
965 and their turnover. *Mol Ecol* **28**, 4709-4724, doi:10.1111/mec.15245 (2019).
- 966 80 Waters, P. D., Duffy, B., Frost, C. J., Delbridge, M. L. & Graves, J. A. M. The human Y  
967 chromosome derives largely from a single autosomal region added to the sex  
968 chromosomes 80–130 million years ago. *Cytogenetic and Genome Research* **92**, 74-79,  
969 doi:10.1159/000056872 (2001).
- 970 81 Prates, I. *et al.* Biogeographic links between southern Atlantic Forest and western South  
971 America: Rediscovery, re-description, and phylogenetic relationships of two rare  
972 montane anole lizards from Brazil. *Mol Phylogenet Evol* **113**, 49-58,  
973 doi:10.1016/j.ympev.2017.05.009 (2017).
- 974 82 Velasco, J. A. *et al.* Climatic niche attributes and diversification in *Anolis* lizards.  
975 *Journal of Biogeography* **43**, 134-144 (2016).
- 976 83 O'Leary, N. A. *et al.* Reference sequence (RefSeq) database at NCBI: current status,  
977 taxonomic expansion, and functional annotation. *Nucleic Acids Res* **44**, D733-745,  
978 doi:10.1093/nar/gkv1189 (2016).
- 979 84 Bachtrog, D. Y-chromosome evolution: emerging insights into processes of Y-  
980 chromosome degeneration. *Nature reviews. Genetics* **14**, 113-124, doi:10.1038/nrg3366  
981 (2013).
- 982 85 Charlesworth, B., Coyne, J. & Barton, N. H. The relative rates of evolution of sex  
983 chromosomes and autosomes. *American Naturalist* **130**, 113-146 (1987).
- 984 86 Singh, N. D., Larracunte, A. M. & Clark, A. G. Contrasting the Efficacy of Selection on  
985 the X and Autosomes in *Drosophila*. *Molecular Biology and Evolution* **25**, 454-467,  
986 doi:10.1093/molbev/msm275 (2007).
- 987 87 Begun, D. J. & Whitley, P. Reduced X-linked nucleotide polymorphism in *Drosophila*  
988 *simulans*. *Proceedings of the National Academy of Sciences of the United States of*  
989 *America* **97**, 5960-5965, doi:10.1073/pnas.97.11.5960 (2000).
- 990 88 Bachtrog, D., Jensen, J. D. & Zhang, Z. Accelerated adaptive evolution on a newly  
991 formed X chromosome. *PLoS Biology* **7**, e1000082, doi:10.1371/journal.pbio (2009).
- 992 89 van de Schoot, M. *Within and between island radiation and genetic variation in Anolis*  
993 *sagrei* MSc thesis, Wageningen University, (2016).
- 994 90 Lieberman-Aiden, E. *et al.* Comprehensive mapping of long-range interactions reveals  
995 folding principles of the human genome. *Science* **326**, 289-293,  
996 doi:10.1126/science.1181369 (2009).
- 997 91 Bolger, A. M., Lohse, M. & Usadel, B. Trimmomatic: a flexible trimmer for Illumina  
998 sequence data. *Bioinformatics* **30**, 2114-2120, doi:10.1093/bioinformatics/btu170 (2014).
- 999 92 Paulino, D. *et al.* Sealer: a scalable gap-closing application for finishing draft genomes.  
1000 *BMC Bioinformatics* **16**, 230, doi:10.1186/s12859-015-0663-4 (2015).
- 1001 93 Li, H. Aligning sequence reads, clone sequences and assembly contigs with BWA-MEM.  
1002 *arXiv*, 1303.3997 (2013).

- 1003 94 Li, R. *et al.* De novo assembly of human genomes with massively parallel short read  
1004 sequencing. *Genome Research* **20**, 265-272, doi:papers3://publication/uuid/5D10FD6E-  
1005 43D1-49C9-A0F9-4B5E618294A1 (2010).
- 1006 95 Altschul, S. F., Gish, W., Miller, W., Myers, E. W. & Lipman, D. J. Basic local  
1007 alignment search tool. *J Mol Biol* **215**, 403-410, doi:10.1016/S0022-2836(05)80360-2  
1008 (1990).
- 1009 96 Nakabayashi, R. & Morishita, S. HiC-Hiker: a probabilistic model to determine contig  
1010 orientation in chromosome-length scaffolds with Hi-C. *Bioinformatics* **36**, 3966-3974,  
1011 doi:10.1093/bioinformatics/btaa288 (2020).
- 1012 97 Mayjonade, B. *et al.* Extraction of high-molecular-weight genomic DNA for long-read  
1013 sequencing of single molecules. *Biotechniques* **61**, 203-205, doi:10.2144/000114460  
1014 (2016).
- 1015 98 Hackl, T., Hedrich, R., Schultz, J. & Forster, F. proovread: large-scale high-accuracy  
1016 PacBio correction through iterative short read consensus. *Bioinformatics* **30**, 3004-3011,  
1017 doi:10.1093/bioinformatics/btu392 (2014).
- 1018 99 Wang, J. R., Holt, J., McMillan, L. & Jones, C. D. FMLRC: Hybrid long read error  
1019 correction using an FM-index. *BMC Bioinformatics* **19**, 50, doi:10.1186/s12859-018-  
1020 2051-3 (2018).
- 1021 100 Boetzer, M. & Pirovano, W. SSPACE-LongRead: scaffolding bacterial draft genomes  
1022 using long read sequence information. *BMC Bioinformatics* **15**, 211, doi:10.1186/1471-  
1023 2105-15-211 (2014).
- 1024 101 Prysycz, L. P. & Gabaldón, T. Redundans: an assembly pipeline for highly heterozygous  
1025 genomes. *Nucleic Acids Research* **44**, e113-e113, doi:10.1093/nar/gkw294 (2016).
- 1026 102 Xu, G. C. *et al.* LR\_Gapcloser: a tiling path-based gap closer that uses long reads to  
1027 complete genome assembly. *Gigascience* **8**, doi:10.1093/gigascience/giy157 (2019).
- 1028 103 Robinson, J. T. *et al.* Juicebox.js Provides a Cloud-Based Visualization System for Hi-C  
1029 Data. *Cell Syst* **6**, 256-258.e251, doi:10.1016/j.cels.2018.01.001 (2018).
- 1030 104 Bernt, M. *et al.* MITOS: Improved de novo metazoan mitochondrial genome annotation.  
1031 *Molecular Phylogenetics and Evolution* **69**, 313-319,  
1032 doi:<https://doi.org/10.1016/j.ympev.2012.08.023> (2013).
- 1033 105 R: A Language and Environment for Statistical Computing (R Foundation for Statistical  
1034 Computing, Vienna, Austria, 2020).
- 1035 106 RepeatModeler Open-1.0 (2008-2015).
- 1036 107 RepeatMasker Open-4.0 (2013-2015).
- 1037 108 Boer, E. F. *et al.* Pigeon foot feathering reveals conserved limb identity networks.  
1038 *Developmental Biology* **454**, 128-144, doi:<https://doi.org/10.1016/j.ydbio.2019.06.015>  
1039 (2019).
- 1040 109 Akashi, H. D., Cadiz Diaz, A., Shigenobu, S., Makino, T. & Kawata, M. Differentially  
1041 expressed genes associated with adaptation to different thermal environments in three  
1042 sympatric Cuban Anolis lizards. *Molecular Ecology* **25**, 2273-2285,  
1043 doi:10.1111/mec.13625 (2016).
- 1044 110 Trapnell, C. *et al.* Differential gene and transcript expression analysis of RNA-seq  
1045 experiments with TopHat and Cufflinks. *Nature Protocols* **7**, 562-578,  
1046 doi:papers3://publication/doi/10.1038/nprot.2012.016 (2012).

- 1047 111 Fu, L., Niu, B., Zhu, Z., Wu, S. & Li, W. CD-HIT: accelerated for clustering the next-  
1048 generation sequencing data. *Bioinformatics* **28**, 3150-3152,  
1049 doi:10.1093/bioinformatics/bts565 (2012).
- 1050 112 Li, W. & Godzik, A. Cd-hit: a fast program for clustering and comparing large sets of  
1051 protein or nucleotide sequences. *Bioinformatics* **22**, 1658-1659,  
1052 doi:10.1093/bioinformatics/btl158 (2006).
- 1053 113 Li, H. *et al.* The Sequence Alignment/Map format and SAMtools. *Bioinformatics* **25**,  
1054 2078-2079, doi:10.1093/bioinformatics/btp352 (2009).
- 1055 114 Li, H. Improving SNP discovery by base alignment quality. *Bioinformatics* **27**, 1157-  
1056 1158, doi:10.1093/bioinformatics/btr076 (2011).
- 1057 115 Danecek, P. *et al.* The variant call format and VCFtools. *Bioinformatics* **27**, 2156-2158,  
1058 doi:10.1093/bioinformatics/btr330 (2011).
- 1059 116 Quinlan, A. R. BEDTools: The Swiss-Army Tool for Genome Feature Analysis. *Curr*  
1060 *Protoc Bioinformatics* **47**, 11.12.11-34, doi:10.1002/0471250953.bi1112s47 (2014).
- 1061 117 Cingolani, P. *et al.* A program for annotating and predicting the effects of single  
1062 nucleotide polymorphisms, SnpEff: SNPs in the genome of *Drosophila melanogaster*  
1063 strain w1118; iso-2; iso-3. *Fly (Austin)* **6**, 80-92, doi:10.4161/fly.19695 (2012).
- 1064 118 Grabherr, M. G. *et al.* Genome-wide synteny through highly sensitive sequence  
1065 alignment: Satsuma. *Bioinformatics* **26**, 1145-1151, doi:10.1093/bioinformatics/btq102  
1066 (2010).
- 1067 119 Krzywinski, M. *et al.* Circos: an information aesthetic for comparative genomics.  
1068 *Genome research* **19**, 1639-1645 (2009).
- 1069 120 Hao, Z. *et al.* RIdeogram: drawing SVG graphics to visualize and map genome-wide data  
1070 on the ideograms. *PeerJ Computer Science* **6**, e251 (2020).
- 1071 121 Kichigin, I. G. *et al.* Evolutionary dynamics of *Anolis* sex chromosomes revealed by  
1072 sequencing of flow sorting-derived microchromosome-specific DNA. *Mol Genet*  
1073 *Genomics* **291**, 1955-1966, doi:10.1007/s00438-016-1230-z (2016).
- 1074 122 Peterson, B. K., Weber, J. N., Kay, E. H., Fisher, H. S. & Hoekstra, H. E. Double Digest  
1075 RADseq: An Inexpensive Method for De Novo SNP Discovery and Genotyping in Model  
1076 and Non-Model Species. *PLoS ONE* **7**, e37135, doi:10.1371/journal.pone.0037135.t001  
1077 (2012).
- 1078 123 Eaton, D. A. PyRAD: assembly of de novo RADseq loci for phylogenetic analyses.  
1079 *Bioinformatics* **30**, 1844-1849 (2014).
- 1080 124 Puritz, J. B., Hollenbeck, C. M. & Gold, J. R. dDocent: a RADseq, variant-calling  
1081 pipeline designed for population genomics of non-model organisms. *PeerJ* **2**, e431,  
1082 doi:10.7717/peerj.431 (2014).
- 1083 125 Li, H. & Durbin, R. Fast and accurate short read alignment with Burrows-Wheeler  
1084 transform. *Bioinformatics* **25**, 1754-1760, doi:10.1093/bioinformatics/btp324 (2009).
- 1085 126 Garrison, E. & Marth, G. Haplotype-based variant detection from short-read sequencing.  
1086 *arXiv preprint arXiv:1207.3907* (2012).
- 1087 127 Purcell, S. *et al.* PLINK: A Tool Set for Whole-Genome Association and Population-  
1088 Based Linkage Analyses. *The American Journal of Human Genetics* **81**, 559-575,  
1089 doi:10.1086/519795 (2007).
- 1090 128 Browning, B. L. & Browning, S. R. Genotype Imputation with Millions of Reference  
1091 Samples. *Am J Hum Genet* **98**, 116-126, doi:10.1016/j.ajhg.2015.11.020 (2016).
- 1092
